# Supplementary material for: Tungsten–platinum μ-carbido and μ-methylidyne complexes
Source: Royal Society of Chemistry journal article supplement (doi:10.1039/c9cc06472a), 2019-01-01

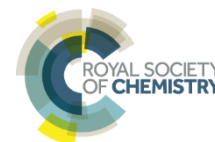

## Chemical Communications

### COMMUNICATION

#### Electronic Supporting Information for:

#### Tungsten-Platinum $\mu$ -Carbido and $\mu$ -Methyldiyne Complexes

Received 00th January 20xx,  
Accepted 00th January 20xx

DOI: 10.1039/x0xx00000x

www.rsc.org/

Benjamin J. Frogley and Anthony F. Hill\*

#### Experimental

Unless otherwise stated, experimental work was carried out at room temperature under a dry and oxygen-free nitrogen atmosphere using standard Schlenk techniques with dried and degassed solvents.

NMR spectra were obtained on a Bruker Avance 400 ( $^1\text{H}$  at 400.1 MHz,  $^{13}\text{C}$  at 100.6 MHz,  $^{19}\text{F}$  at 376.5 MHz), a Bruker Avance 600 ( $^1\text{H}$  at 600.0 MHz,  $^{13}\text{C}$  at 150.9 MHz) or a Bruker Avance 700 ( $^1\text{H}$  at 700.0 MHz,  $^{13}\text{C}$  at 176.1 MHz) spectrometers at the temperatures indicated. Chemical shifts ( $\delta$ ) are reported in ppm with coupling constants given in Hz and are referenced to the solvent peak, or external references ( $\text{CFCl}_3$  for  $^{19}\text{F}\{^1\text{H}\}$ , 85%  $\text{H}_3\text{PO}_4$  in  $\text{H}_2\text{O}$  for  $^{31}\text{P}\{^1\text{H}\}$ ), 1.2M  $\text{Na}_2\text{PtCl}_6$  in  $\text{H}_2\text{O}$  for  $^{195}\text{Pt}$ ). The multiplicities of NMR resonances are denoted by the abbreviations s (singlet), d (doublet), t (triplet), m (multiplet), br (broad) and combinations thereof for more highly coupled systems. Where applicable, the stated multiplicity refers to that of the primary resonance exclusive of  $^{183}\text{W}$  satellites. In some cases, distinct peaks were observed in the  $^1\text{H}$  and  $^{13}\text{C}\{^1\text{H}\}$  NMR spectra, but to the level of accuracy that is reportable (i.e. 2 decimal places for  $^1\text{H}$  NMR, 1 decimal place for  $^{13}\text{C}$  NMR) they are reported as having the same chemical shift. The abbreviation 'pz' is used to refer to the pyrazolyl rings on the hydridotris(3,5-dimethylpyrazol-1-yl)borate ( $\text{Tp}^*$ ) ligand. Spectra provided generally correspond to samples obtained directly from chromatography and may contain residual solvent as recrystallised samples often display reduced solubility.

Infrared spectra were obtained using a Shimadzu FTIR-8400 spectrometer. The strengths of IR absorptions are denoted by the abbreviations vs (very strong), s (strong), m (medium), w (weak), sh (shoulder) and br (broad). Elemental microanalytical data were provided the London Metropolitan University. High-resolution electrospray ionisation mass spectrometry (ESI-MS) was performed by the ANU Research School of Chemistry mass spectrometry service with acetonitrile or methanol as the matrix.

Data for X-ray crystallography were collected with an Agilent Xcalibur CCD diffractometer or an Agilent SuperNova CCD diffractometer using Mo-K $\alpha$  radiation ( $\lambda = 0.71073 \text{ \AA}$ ) or Cu-K $\alpha$  radiation ( $\lambda = 1.54184 \text{ \AA}$ ) and the CrysAlis PRO software.<sup>1</sup> Data for **5** were collected at the Australian Synchrotron on the MX1 beamline using silicon double crystal monochromated synchrotron radiation at 100 K. Raw frame data were collected using Bluice<sup>2</sup> and data reduction, interframe scaling, unit cell refinement and absorption corrections were processed using XDS.<sup>3</sup> The structures were solved by direct or Patterson methods and refined by full-matrix least-squares on  $F^2$  using the SHELXS or SHELXT and SHELXL programs.<sup>4</sup> Hydrogen atoms were located geometrically and refined using a riding model. Diagrams were produced using the CCDC visualisation program Mercury.<sup>5</sup>

Synthesis of the bromocarbene  $[\text{W}(\equiv\text{CBr})(\text{CO})_2(\text{Tp}^*)]$  has been described previously.<sup>6</sup> The platinum complexes chloro(2,2':6',2''-terpyridine)platinum(II) chloride  $[\text{PtCl}(\text{terpy})]\text{Cl} \cdot 2\text{H}_2\text{O}$ ,<sup>7</sup> chloro(2,2':6',2''-terpyridine)platinum(II) hexafluorophosphate  $[\text{PtCl}(\text{terpy})]\text{PF}_6$ ,<sup>8</sup> dichloro(1,10-phenanthroline)platinum(II)  $[\text{PtCl}_2(\text{phen})]$ ,<sup>9</sup> dichloro(tetramethylcyclobutadiene)platinum(II),  $[\text{PtCl}_2(\eta^4\text{-C}_4\text{Me}_4)]$ ,<sup>10</sup> and dichloro(tetraethylcyclobutadiene)platinum(II)  $[\text{PtCl}_2(\eta^4\text{-C}_4\text{Et}_4)]$ <sup>10</sup> were synthesised according to the literature methods.

**$[\text{W}(\equiv\text{C}^*\text{Pt}(\text{terpy}))(\text{CO})_2(\text{Tp}^*)]\text{PF}_6$  (4).** A solution of  $[\text{W}(\equiv\text{CBr})(\text{CO})_2(\text{Tp}^*)]$  (200 mg, 0.318 mmol) in THF (10 mL) at  $-78^\circ\text{C}$  was treated with  $n\text{BuLi}$  (200  $\mu\text{L}$ , 1.6 M in hexanes, 0.32 mmol) and the mixture was stirred for 30 min at reduced temperature. After this time,  $[\text{PtCl}(\text{terpy})]\text{PF}_6$  (194 mg, 0.318 mmol) was added, the mixture was warmed to RT and stirring continued for 2 h. The volatiles were then removed *in vacuo* and the residue was subjected to column chromatography (30 x 3 cm silica gel column), eluting first with  $\text{CH}_2\text{Cl}_2$  and gradually increasing the polarity to 50% v/v  $\text{CH}_3\text{CN}/\text{CH}_2\text{Cl}_2$ . A slow-moving red-purple band was collected and the volatiles were removed under reduced pressure to give a purple precipitate which was collected by filtration and washed with petroleum spirits (30–

40 °C) (3 x 5 mL) and ice-cold CH<sub>2</sub>Cl<sub>2</sub> (3 x 5 mL) to give a purple solid of pure **4** (228 mg, 0.203 mmol, 64%). IR (CH<sub>2</sub>Cl<sub>2</sub>, cm<sup>-1</sup>): 1954, 1858 ν<sub>CO</sub>. <sup>1</sup>H NMR (400 MHz, CD<sub>3</sub>CN, 25 °C): δ<sub>H</sub> = 2.38 (s, 3 H, pzCH<sub>3</sub>), 2.42 (s, 3 H, pzCH<sub>3</sub>), 2.46 (s, 6 H, pzCH<sub>3</sub>), 2.69 (s, 6 H, pzCH<sub>3</sub>), 5.84 (s, 1 H, pzCH), 5.95 (s, 2 H, pzCH), 7.57 (br, 2 H, *terpy*), 8.25–8.42 (m, 7 H, *terpy*), 8.69 (br, 2 H, *terpy*). <sup>13</sup>C{<sup>1</sup>H} NMR (101 MHz, CD<sub>3</sub>CN, 25 °C): δ<sub>C</sub> = 12.7, 12.9, 15.3, 17.1 (pzCH<sub>3</sub>), 107.2, 107.3 (pzCH), 124.7, 126.7, 129.2, 142.8, 143.0 (*terpy*), 146.2, 147.1, 152.6, 153.1 (pzCCH<sub>3</sub>), 154.2, 154.8, 160.0 (*terpy*), 228.3 (WCO). W≡Cpt was not observed but is tentatively assigned at ca 368 ppm based on <sup>1</sup>H-<sup>13</sup>C HMBC correlations with pzCH<sub>3</sub> protons. <sup>31</sup>P{<sup>1</sup>H} NMR (162 MHz, CD<sub>3</sub>CN, 25 °C): δ<sub>P</sub> = -144.6 (heptet, <sup>1</sup>J<sub>PF</sub> = 709, PF<sub>6</sub>). <sup>19</sup>F{<sup>1</sup>H} NMR (376 MHz, CD<sub>3</sub>CN, 25 °C): δ<sub>F</sub> = -72.9 (d, <sup>1</sup>J<sub>FP</sub> = 709, PF<sub>6</sub>). MS (ESI, *m/z*): Found: 976.2018. Calcd for C<sub>33</sub>H<sub>33</sub><sup>11</sup>Bn<sub>9</sub>O<sub>2</sub><sup>195</sup>Pt<sup>184</sup>W [M-PF<sub>6</sub>]<sup>+</sup>: 976.1997. Anal. Found: C, 35.40; H, 3.08; N, 11.35. Calcd for C<sub>33</sub>H<sub>33</sub>BF<sub>6</sub>N<sub>9</sub>O<sub>2</sub>PtW: C, 35.31; H, 2.96; N, 11.23%. A crystal suitable for structure determination was grown by slow evaporation of an acetonitrile solution. *Crystal data for* C<sub>33</sub>H<sub>33</sub>BF<sub>6</sub>N<sub>9</sub>O<sub>2</sub>PtW (*M* = 1122.40 g.mol<sup>-1</sup>): monoclinic, space group P2<sub>1</sub>/n (no. 14), *a* = 19.2295(3), *b* = 7.9562(2), *c* = 27.8172(5) Å, β = 100.500(2)°, *V* = 4184.59(15) Å<sup>3</sup>, *Z* = 4, *T* = 150.0(1) K, μ(CuKα) = 12.117 mm<sup>-1</sup>, *D*<sub>calc</sub> = 1.782 g.cm<sup>-3</sup>, 30606 reflections measured (9.354° ≤ 2θ ≤ 147.584°), 8396 unique (*R*<sub>int</sub> = 0.0445, *R*<sub>sigma</sub> = 0.0428) which were used in all calculations. The final *R*<sub>1</sub> was 0.0406 (*I* > 2σ(*I*)) and *wR*<sub>2</sub> was 0.1026 (all data). CCDC 1945291.

**[(Tp\*)(CO)<sub>2</sub>W≡CptCl(phen{C≡W(CO)<sub>2</sub>(Tp\*)-2})]** (**5**). A solution of [W(≡CBr)(CO)<sub>2</sub>(Tp\*)] (200 mg, 0.318 mmol) in THF (10 mL) at -78 °C was treated with <sup>n</sup>BuLi (200 μL, 1.6 M in THF, 0.32 mmol) and the mixture was stirred for 30 min at reduced temperature. After this time, [PtCl<sub>2</sub>(phen)] (71 mg, 0.16 mmol) was added, the mixture was slowly warmed to RT and stirring was continued for 2 h. The volatiles were then removed under reduced pressure and the residue was subjected to column chromatography (50 x 3 cm silica gel column), eluting initially with petroleum ether (40–60 °C) and gradually increasing the ratio to 60% v/v CH<sub>2</sub>Cl<sub>2</sub>/petrol. An orange band was collected and the solvents were removed under reduced pressure to give an orange solid of pure **5** (136 mg, 0.0902 mmol, 57%). IR (CH<sub>2</sub>Cl<sub>2</sub>, cm<sup>-1</sup>): 1977s, 1944s, 1886s, 1854s ν<sub>CO</sub>. UV-Vis (CH<sub>2</sub>Cl<sub>2</sub>): λ<sub>max</sub> = 395 nm (ε = 5250 L.mol<sup>-1</sup>cm<sup>-1</sup>). <sup>1</sup>H NMR (600 MHz, CDCl<sub>3</sub>, 25 °C): δ<sub>H</sub> = 2.32 (s, 3 H, pzCH<sub>3</sub>), 2.36 (s, 3 H, pzCH<sub>3</sub>), 2.39 (s, 3 H, pzCH<sub>3</sub>), 2.41 (s, 3 H, pzCH<sub>3</sub>), 2.42 (s, 6 H, pzCH<sub>3</sub>), 2.46 (s, 3 H, pzCH<sub>3</sub>), 2.70 (s, 3 H, pzCH<sub>3</sub>), 2.72 (s, 6 H, pzCH<sub>3</sub>), 2.79 (s, 6 H, pzCH<sub>3</sub>), 5.69 (s, 1 H, pzCH), 5.78 (2 x s coincidental, 2 H, pzCH), 5.93 (s, 2 H, pzCH), 7.08 (br, 1 H, *phen*), 7.77 (d, <sup>3</sup>J<sub>HH</sub> = 8.6, 1 H, *phen*), 7.81 (d, <sup>3</sup>J<sub>HH</sub> = 8.6, 1 H, *phen*), 7.99 (d, <sup>3</sup>J<sub>HH</sub> = 8.6, 1 H, *phen*), 8.27 (d, <sup>3</sup>J<sub>HH</sub> = 8.5, 1 H, *phen*), 8.38 (d, <sup>3</sup>J<sub>HH</sub> = 8.5, 1 H, *phen*), 9.64 (br, 1 H, *phen*). <sup>13</sup>C{<sup>1</sup>H} NMR (151 MHz, CDCl<sub>3</sub>, 25 °C): δ<sub>C</sub> = 12.5, 12.7, 12.8, 13.0 (2 C), 15.0, 15.4, 15.5, 16.9 (2 C), 17.7 (2 C) (pzCH<sub>3</sub>), 106.0, 106.1, 106.9, 107.0, 107.9, 108.0 (pzCH), 124.2, 125.9, 127.0, 127.6, 131.1, 133.6, 136.0, 136.2, 143.7, 144.3, 144.4, 144.8, 145.3, 146.5, 147.0, 147.8, 150.7, 152.0, 152.3, 152.4, 152.5, 154.6, 154.7, 168.7 (total of 24 C, pzCCH<sub>3</sub> & *phen*), 226.1, 227.3 (CO), 267.0 (W≡CC), 331.3 (br, W≡Cpt). MS (ESI, *m/z*): Found: 1508.2811. Calcd for

C<sub>48</sub>H<sub>52</sub><sup>11</sup>B<sub>2</sub>CIN<sub>14</sub>O<sub>4</sub><sup>195</sup>Pt<sup>184</sup>W<sub>2</sub> [M + H]<sup>+</sup>: 1508.2844. Found: 1531.2709. Calcd for C<sub>48</sub>H<sub>51</sub><sup>11</sup>B<sub>2</sub>CIN<sub>14</sub>O<sub>4</sub><sup>195</sup>Pt<sup>184</sup>W<sub>2</sub> [M + Na]<sup>+</sup>: 1531.2670. Anal. Found: C, 38.08; H, 3.46; N, 12.82. Calcd for C<sub>48</sub>H<sub>51</sub>B<sub>2</sub>CIN<sub>14</sub>O<sub>4</sub>PtW<sub>2</sub>: C, 38.23; H, 3.41; N, 13.00%. Crystals used for structure determination were grown by slow evaporation of a CHCl<sub>3</sub>/ethanol mixture and proved to be a chloroform solvate. *Crystal data for* C<sub>49</sub>H<sub>52</sub>B<sub>2</sub>Cl<sub>4</sub>N<sub>14</sub>O<sub>4</sub>PtW<sub>2</sub> (*M* = 1627.25 g.mol<sup>-1</sup>): monoclinic, space group P2<sub>1</sub>/n (no. 14), *a* = 17.029(8), *b* = 20.850(9), *c* = 18.411(7) Å, β = 112.825(7)°, *V* = 6025(4) Å<sup>3</sup>, *Z* = 4, *T* = 100.033(2) K, μ(Synchrotron) = 6.355 mm<sup>-1</sup>, *D*<sub>calc</sub> = 1.794 g.cm<sup>-3</sup>, 47606 reflections measured (2.768° ≤ 2θ ≤ 52.738°), 11485 unique (*R*<sub>int</sub> = 0.1946, *R*<sub>sigma</sub> = 0.1316) which were used in all calculations. The final *R*<sub>1</sub> was 0.0782 (*I* > 2σ(*I*)) and *wR*<sub>2</sub> was 0.2202 (all data) for 697 refined parameters with 0 restraints. CCDC 1945292.

**[W<sub>2</sub>Pt(μ-CH)<sub>2</sub>(CO)<sub>4</sub>(Tp\*)<sub>2</sub>]** (**7**). A solution of [W(≡CBr)(CO)<sub>2</sub>(Tp\*)] (200 mg, 0.318 mmol) in THF (10 mL) at -78 °C was treated with <sup>n</sup>BuLi (200 μL, 1.6 M in THF, 0.32 mmol) and the mixture was stirred for 30 min at reduced temperature. After this time, [PtCl<sub>2</sub>(η<sup>4</sup>-C<sub>4</sub>Me<sub>4</sub>)] (60 mg, 0.16 mmol) was added, the mixture was slowly warmed to RT and stirring was continued for 1 h. The volatiles were removed under reduced pressure and the residue was subjected to column chromatography (40 x 3 cm silica gel column), eluting initially with petroleum ether (40–60 °C) and gradually increasing the polarity to 60% v/v CH<sub>2</sub>Cl<sub>2</sub>/petrol. A bright orange band was collected and the solvents were removed under reduced pressure to give an orange solid of pure **7** (111 mg, mmol, 0.0857 mmol, 53%). IR (CH<sub>2</sub>Cl<sub>2</sub>, cm<sup>-1</sup>): 1976s, 1943s ν<sub>CO</sub>, 1811 ν<sub>μCO</sub>. UV-Vis (CH<sub>2</sub>Cl<sub>2</sub>): λ<sub>max</sub> = 321 (ε = 10,960 L.mol<sup>-1</sup>cm<sup>-1</sup>). <sup>1</sup>H NMR (700 MHz, CDCl<sub>3</sub>, 25 °C): δ<sub>H</sub> = 2.20–2.52 (br, 12 H, pzCH<sub>3</sub>), 2.37 (s, 6 H, pzCH<sub>3</sub>), 2.41 (s, 12 H, pzCH<sub>3</sub>), 2.59 (s, 6 H, pzCH<sub>3</sub>), 5.80–5.95 (br, 4 H, pzCH), 5.84 (s, 2 H, pzCH), 12.09 (s, <sup>2</sup>J<sub>HW</sub> = 44, 2 H, W≡CH). <sup>1</sup>H NMR (700 MHz, CDCl<sub>3</sub>, -40 °C): δ<sub>H</sub> = 2.17 (s, 6 H, pzCH<sub>3</sub>), 2.34 (s, 6 H, pzCH<sub>3</sub>), 2.35 (s, 6 H, pzCH<sub>3</sub>), 2.37 (s, 6 H, pzCH<sub>3</sub>), 2.42 (s, 6 H, pzCH<sub>3</sub>), 2.57 (s, 6 H, pzCH<sub>3</sub>), 2.65 (s, 6 H, pzCH<sub>3</sub>), 5.77 (s, 2 H, pzCH), 5.84 (s, 2 H, pzCH), 5.99 (s, 2 H, pzCH), 12.09 (s, <sup>2</sup>J<sub>HW</sub> = 44, 2 H, W≡CH). <sup>13</sup>C{<sup>1</sup>H} NMR (176 MHz, CDCl<sub>3</sub>, -40 °C): δ<sub>C</sub> = 13.0, 13.0, 13.1, 15.6, 17.3, 19.0 (pzCH<sub>3</sub>), 107.1, 107.2, 107.6 (pzCH), 144.2, 144.5, 145.2, 151.0, 153.2, 154.0 (pzCCH<sub>3</sub>), 218.6, 229.9 (WCO), 293.8 (W≡CH). <sup>195</sup>Pt NMR (86 MHz, CDCl<sub>3</sub>, 25 °C): δ<sub>Pt</sub> = -3084 (<sup>1</sup>J<sub>PtW</sub> = 209). MS (ESI, *m/z*): Found: 1295.2706. Calcd for C<sub>36</sub>H<sub>46</sub><sup>11</sup>B<sub>2</sub>N<sub>12</sub>O<sub>4</sub><sup>195</sup>Pt<sup>184</sup>W<sub>2</sub> [M-e]<sup>+</sup>: 1295.2624. Found: 1318.2582. Calcd for C<sub>36</sub>H<sub>46</sub><sup>11</sup>B<sub>2</sub>NaN<sub>12</sub>O<sub>4</sub><sup>195</sup>Pt<sup>184</sup>W<sub>2</sub> [M+Na]<sup>+</sup>: 1318.2522. Anal. Found: C, 33.41; H, 3.59; N, 12.88%. Calcd for C<sub>36</sub>H<sub>46</sub>B<sub>2</sub>N<sub>12</sub>O<sub>4</sub>PtW<sub>2</sub>: C, 33.38; H, 3.58; N, 12.98%. A crystal suitable for structure determination was grown by slow evaporation of an acetonitrile solution. *Crystal data for* C<sub>38</sub>H<sub>49</sub>B<sub>2</sub>N<sub>13</sub>O<sub>4</sub>PtW<sub>2</sub> (*M* = 1336.31 g.mol<sup>-1</sup>): tridinic, space group P-1 (no. 2), *a* = 10.5256(5) Å, *b* = 12.7095(7), *c* = 17.9699(8), α = 70.976(5)°, β = 89.192(4)°, γ = 80.546(4)°, *V* = 2239.8(2) Å<sup>3</sup>, *Z* = 2, *T* = 150.0(1) K, μ(CuKα) = 15.448 mm<sup>-1</sup>, *D*<sub>calc</sub> = 1.981 g.cm<sup>-3</sup>, 12461 reflections measured (7.464° ≤ 2θ ≤ 133.192°), 7842 unique (*R*<sub>int</sub> = 0.0233, *R*<sub>sigma</sub> = 0.0381) which were used in all calculations. The final *R*<sub>1</sub> was 0.0390 (*I* > 2σ(*I*)) and *wR*<sub>2</sub> was 0.0959 (all data) for 554 refined parameters with 0 restraints. CCDC 1945293.

## References

1. Agilent, CrysAlis PRO, Agilent Technologies Ltd, Yarnton, Oxfordshire, England, 2014.
2. T. M. McPhillips, S. E. McPhillips, H.-J. Chiu, A. E. Cohen, A. M. Deacon, P. J. Ellis, E. Garman, A. Gonzalez, N. K. Sauter, R. P. Phizackerley, S. M. Soltis and P. Kuhn, *Journal of Synchrotron Radiation*, 2002, **9**, 401-406.
3. W. Kabsch, *J. Appl. Crystallogr.*, 1993, **26**, 795-800.
4. (a) G. Sheldrick, *Acta Crystallogr. Sect. A: Found. Crystallogr.*, 2008, **64**, 112-122; (b) G. M. Sheldrick, *Acta Crystallogr. Sect. C: Cryst. Struct. Commun.*, 2015, **71**, 3-8.
5. (a) C. F. Macrae, P. R. Edgington, P. McCabe, E. Pidcock, G. P. Shields, R. Taylor, M. Towler and J. van de Streek, *J. Appl. Crystallogr.*, 2006, **39**, 453-457; (b) C. F. Macrae, I. J. Bruno, J. A. Chisholm, P. R. Edgington, P. McCabe, E. Pidcock, L. Rodriguez-Monge, R. Taylor, J. van de Streek and P. A. Wood, *J. Appl. Crystallogr.*, 2008, **41**, 466-470.
6. T. Desmond, F. J. Lalor, G. Ferguson and M. Parvez, *J. Chem. Soc., Chem. Commun.*, 1984, 75-77.
7. S. Banerjee, J. A. Kitchen, S. A. Bright, J. E. O'Brien, D. C. Williams, J. M. Kelly and T. Gunnlaugsson, *Chem. Commun.*, 2013, **49**, 8522-8524.
8. J. A. Bailey, M. G. Hill, R. E. Marsh, V. M. Miskowski, W. P. Schaefer and H. B. Gray, *Inorg. Chem.*, 1995, **34**, 4591-4599.
9. G. R. Newkome, K. J. Theriot, F. R. Fronczek and B. Villar, *Organometallics*, 1989, **8**, 2513-2523.
10. D. Steinborn, R. Nünthel, J. Sieler and R. Kempe, *Chem. Ber.*, 1993, **126**, 2393-2396.

## Chemical Communications

## COMMUNICATION

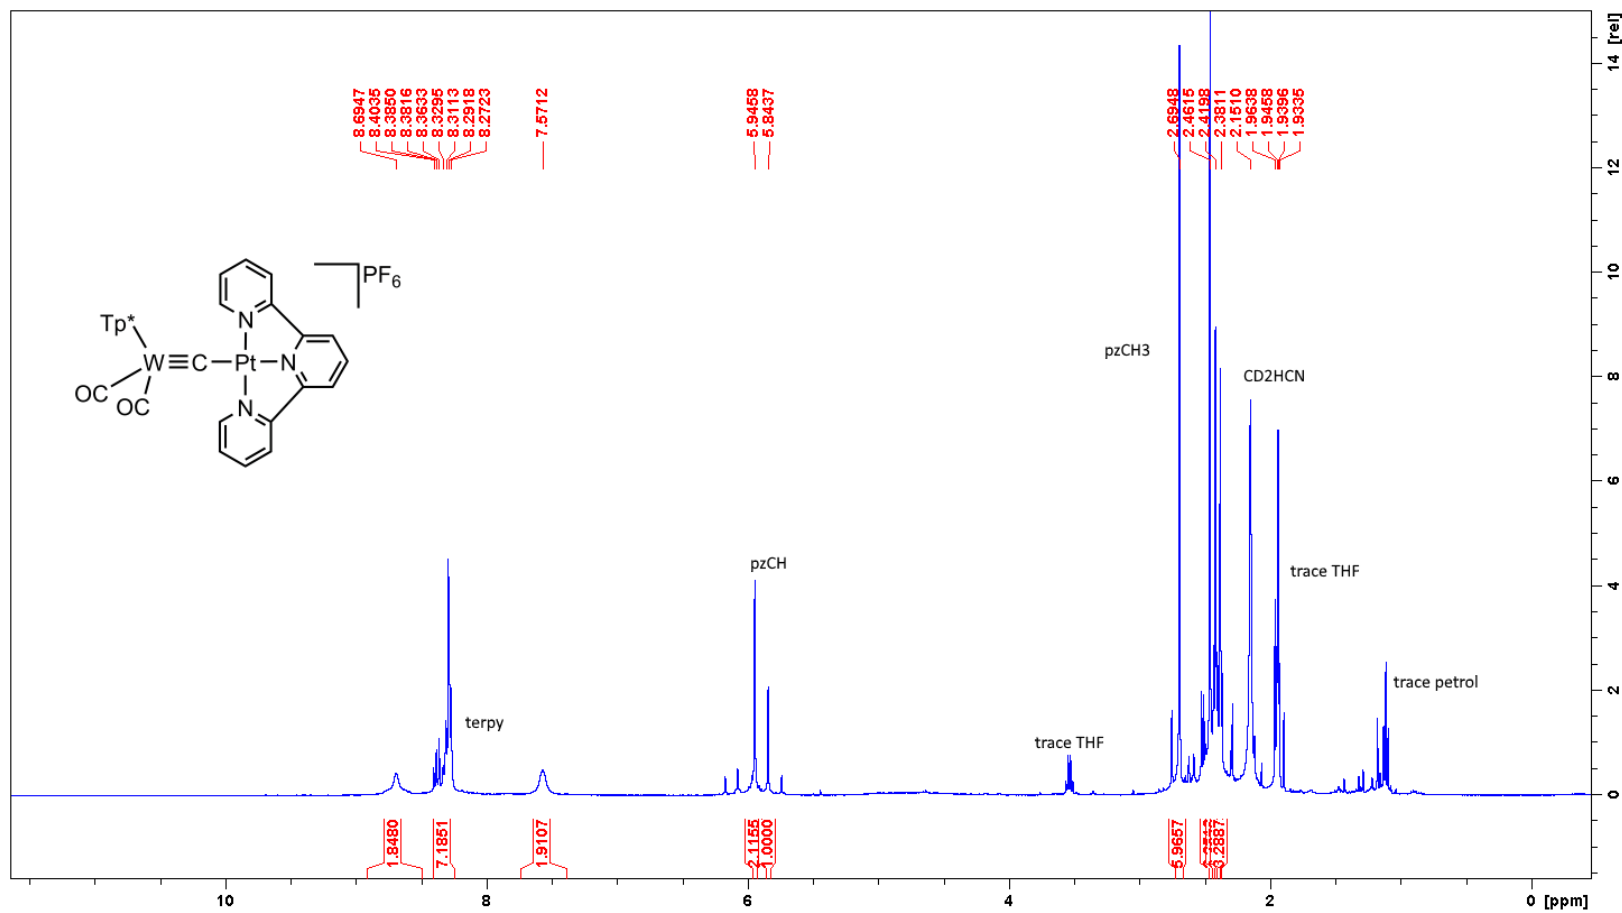

<sup>1</sup>H NMR spectrum (400 MHz, CD<sub>3</sub>CN, 25 °C, δ) of  $[W\{\equiv C\}Pt(terpy)](CO)_2(Tp^*)PF_6$  (4).

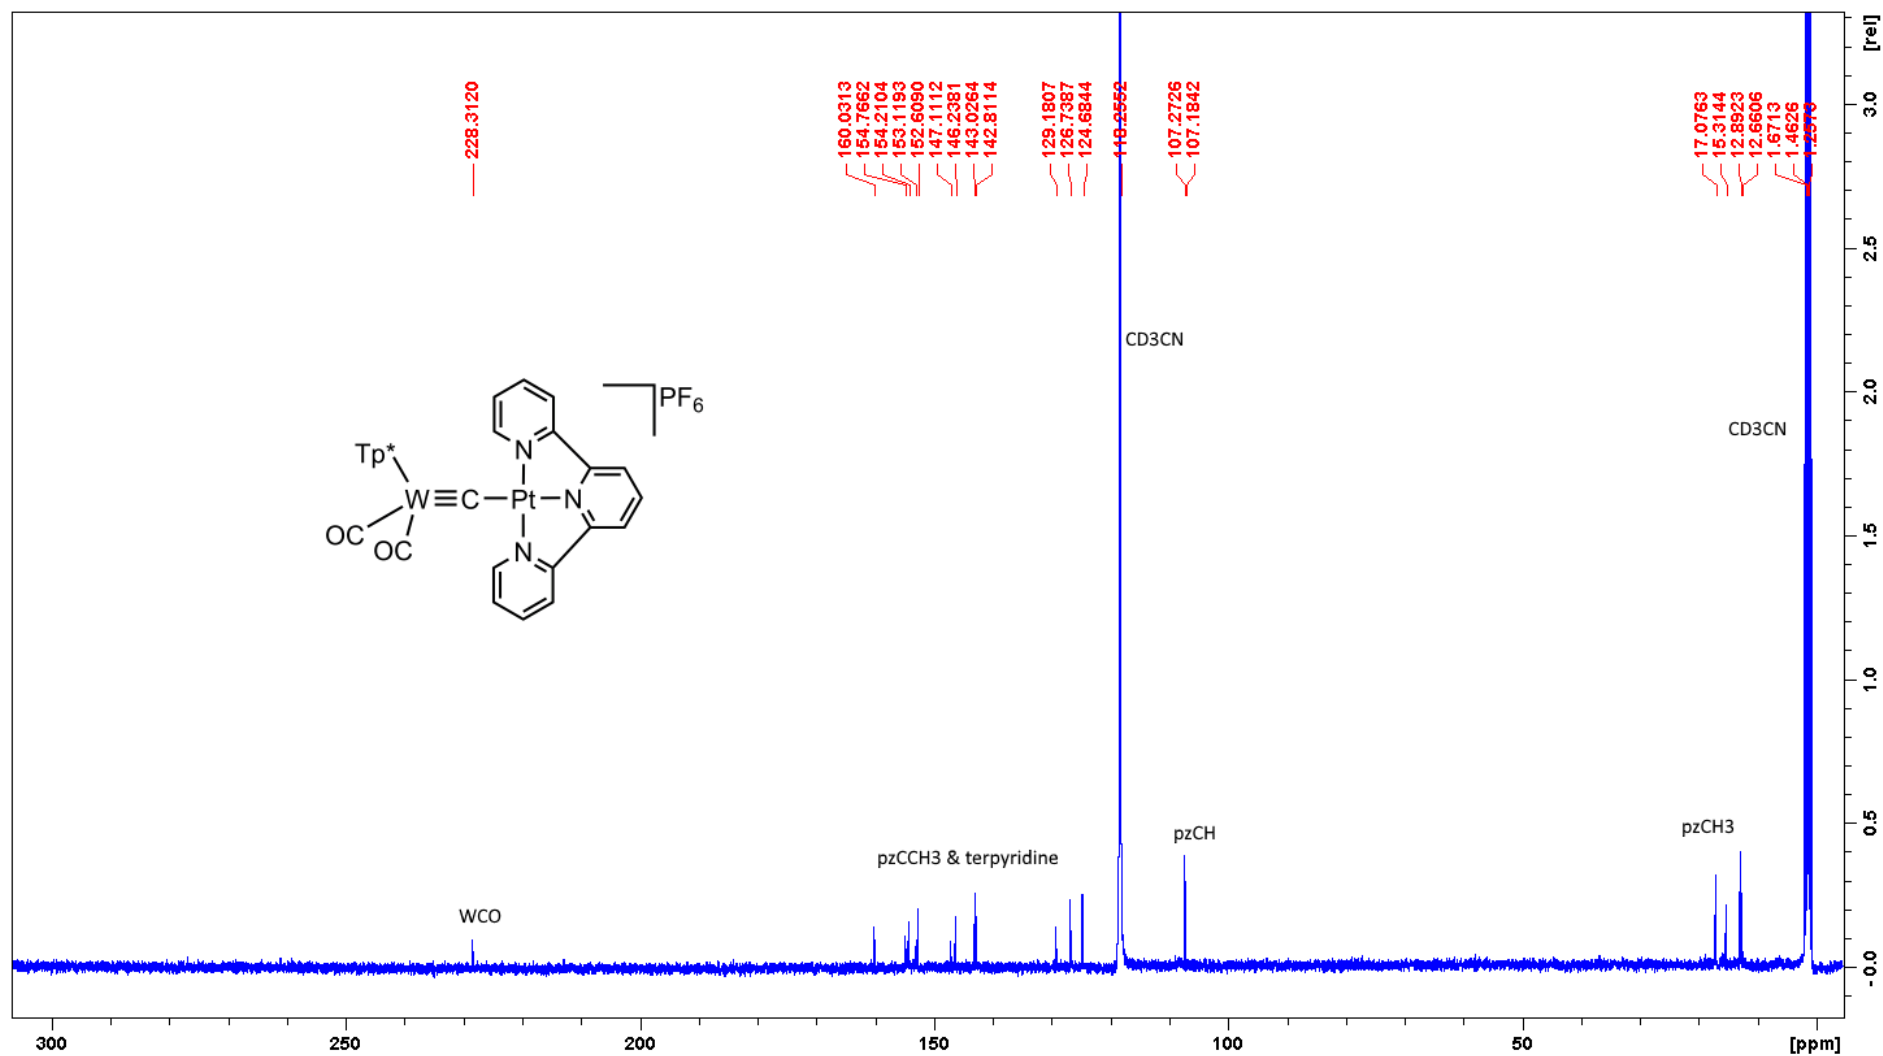

$^{13}C\{^1H\}$  NMR spectrum (101 MHz,  $CD_3CN$ , 25 °C,  $\delta$ ) of  $[W\{\equiv C Pt(terpy)\}(CO)_2(Tp^*)]PF_6$  (4).

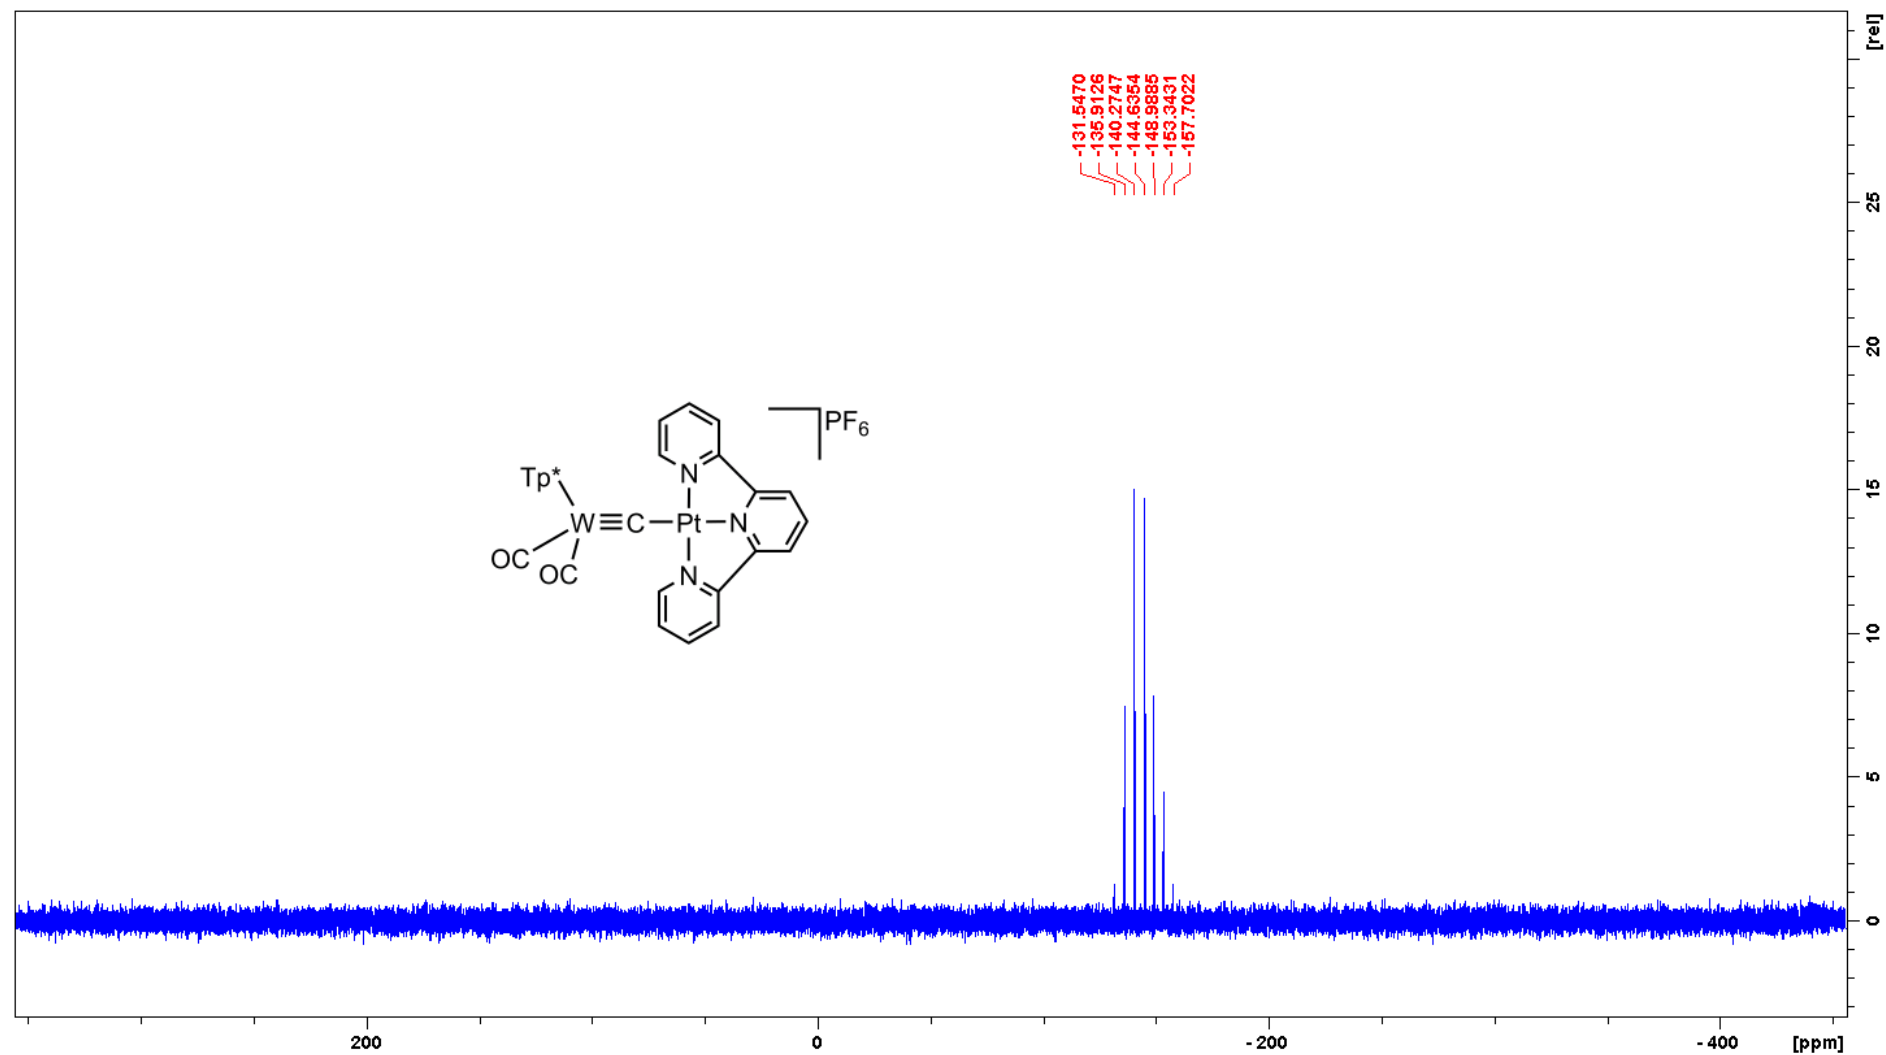

$^{31}\text{P}\{^1\text{H}\}$  NMR spectrum (162 MHz,  $\text{CD}_3\text{CN}$ , 25 °C,  $\delta$ ) of  $[\text{W}\{\equiv\text{Cpt}(\text{terpy})\}(\text{CO})_2(\text{Tp}^*)]\text{PF}_6$  (4).

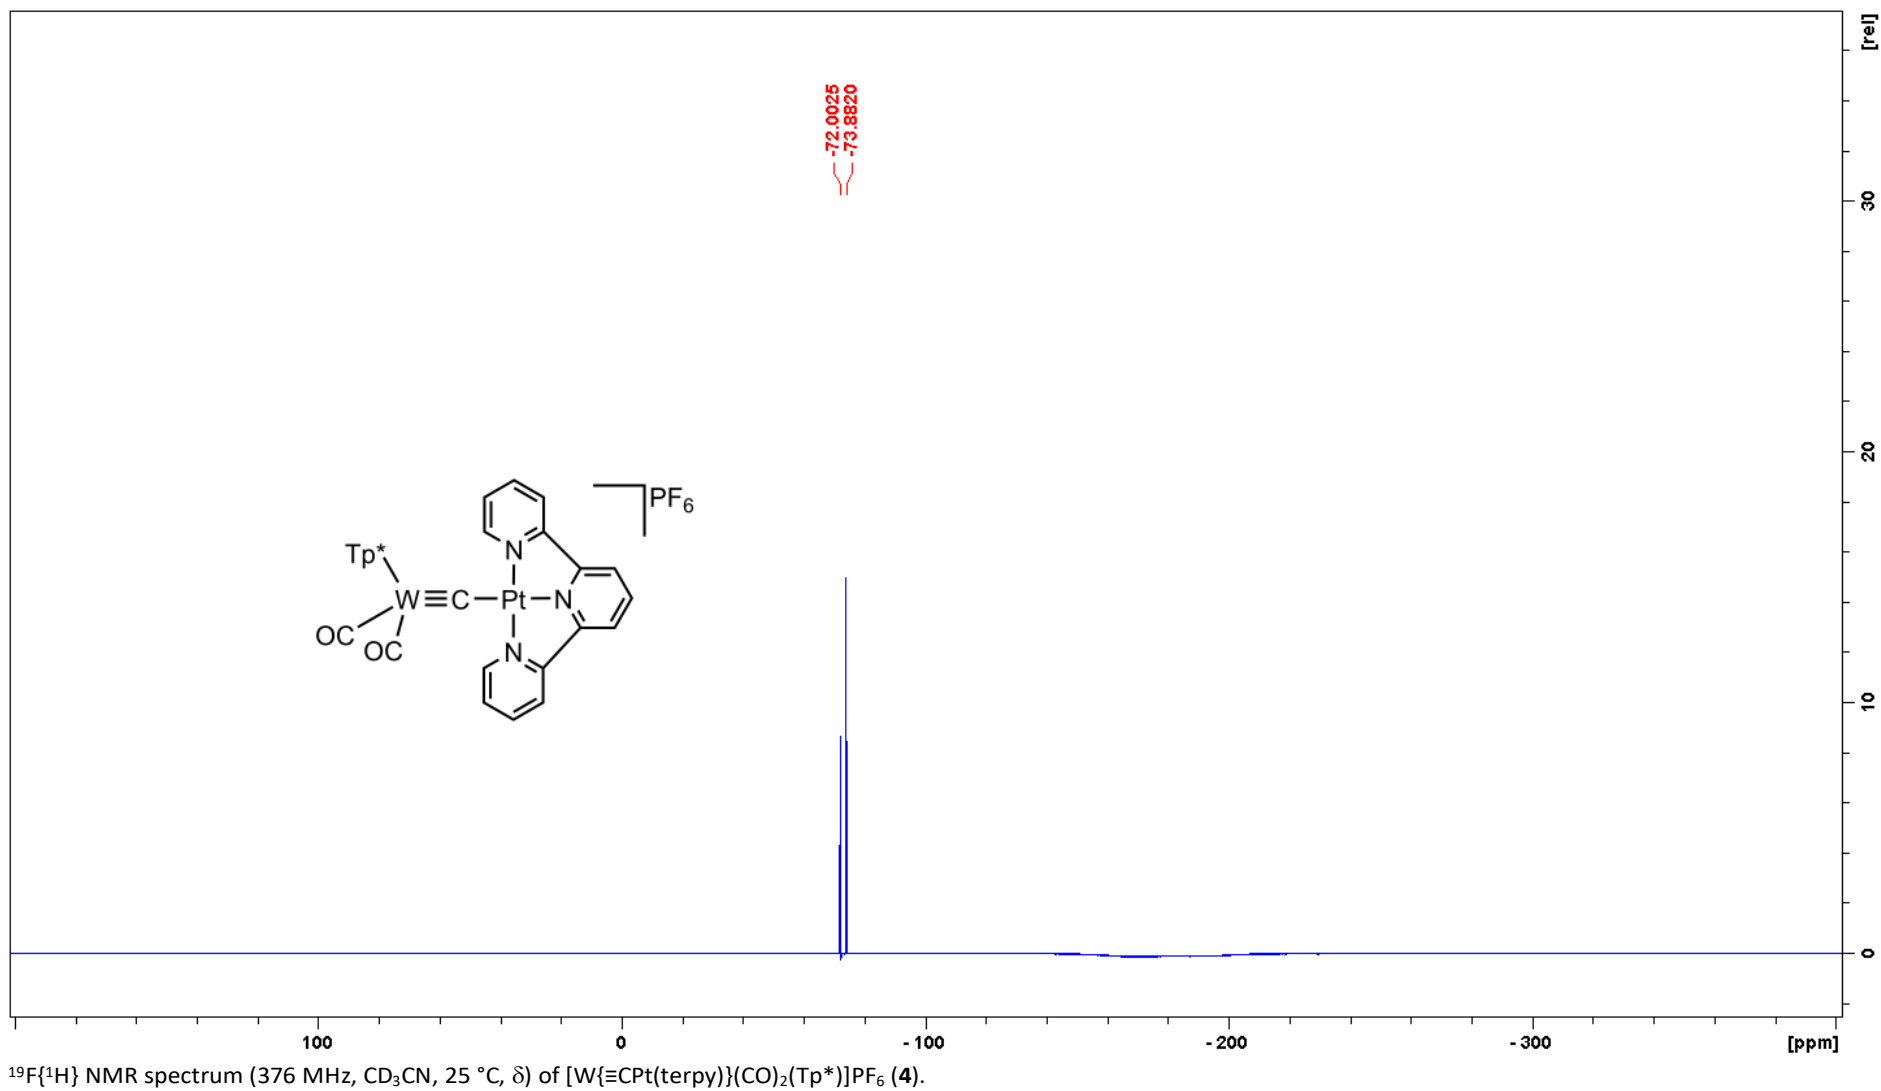

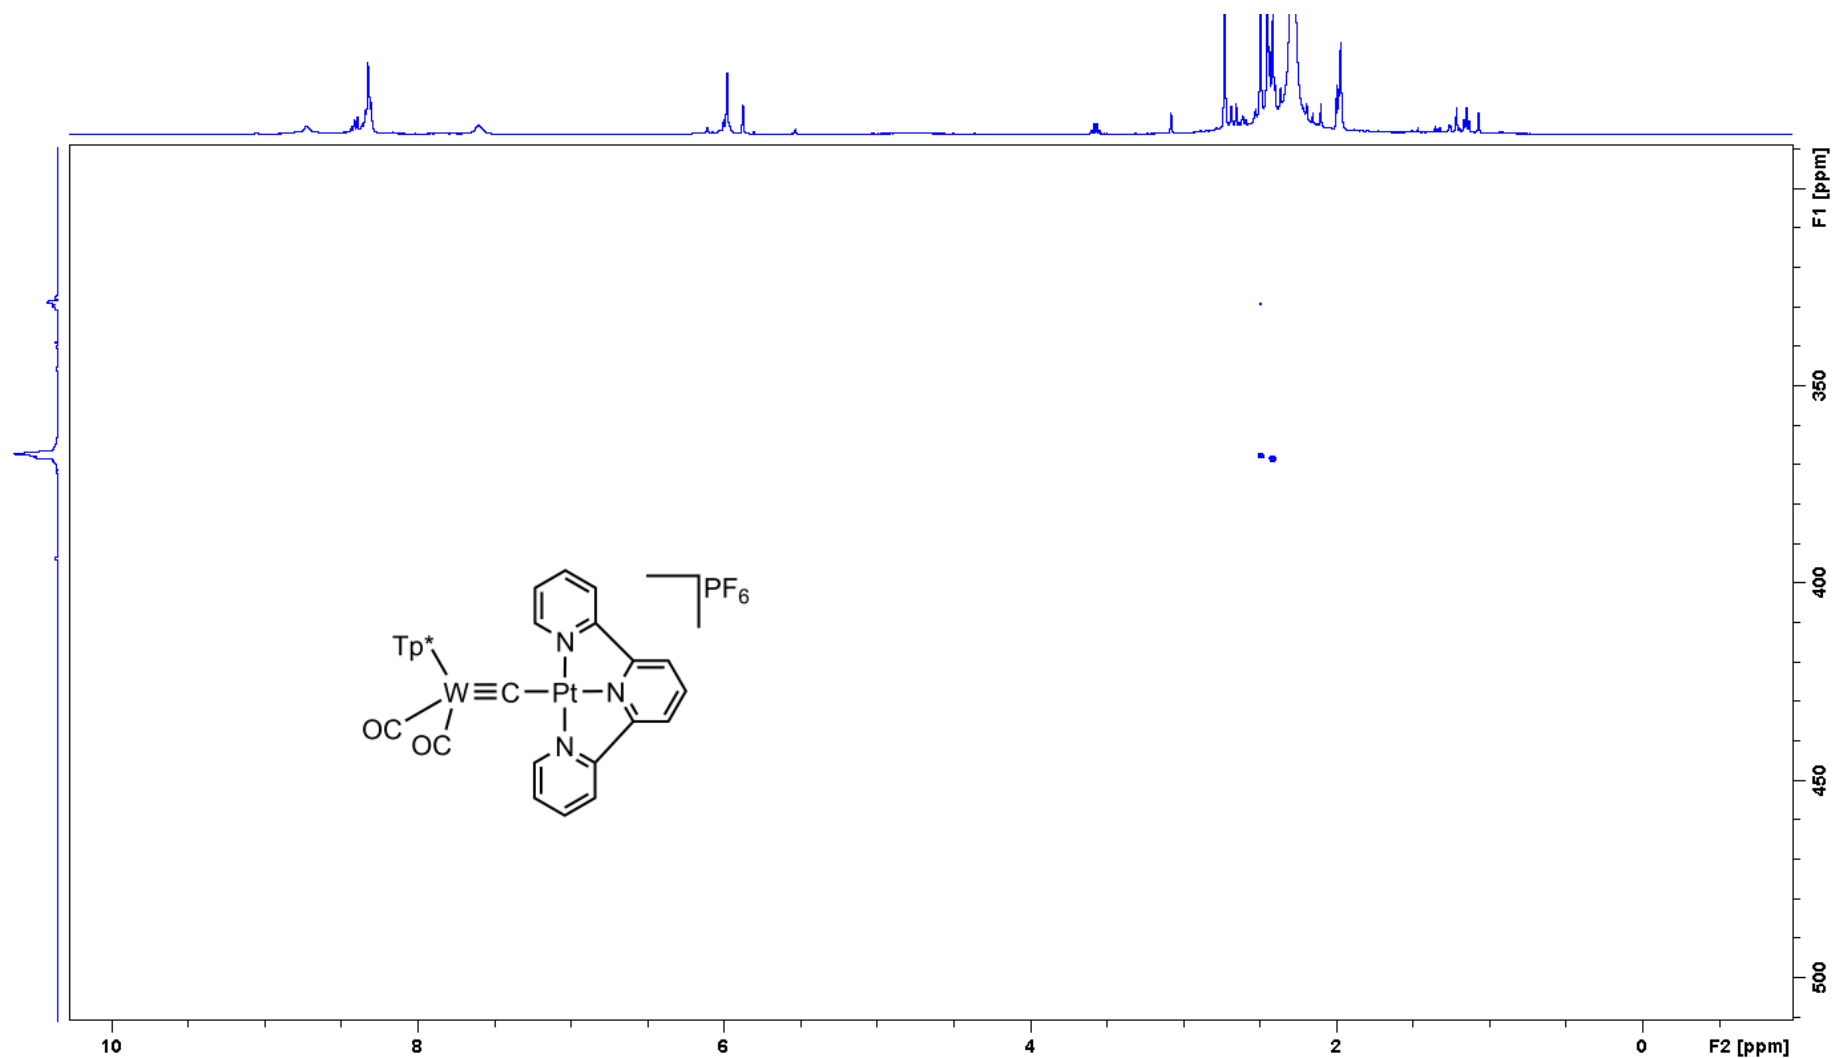

$^1\text{H}$ - $^{13}\text{C}$  HMBC NMR spectrum (400 & 101 MHz,  $\text{CD}_3\text{CN}$ , 25  $^\circ\text{C}$ ,  $\delta$ ) of  $[\text{W}\{\equiv\text{C}(\text{Pt}(\text{terpy}))(\text{CO})_2(\text{Tp}^*)\}]\text{PF}_6$  (4).

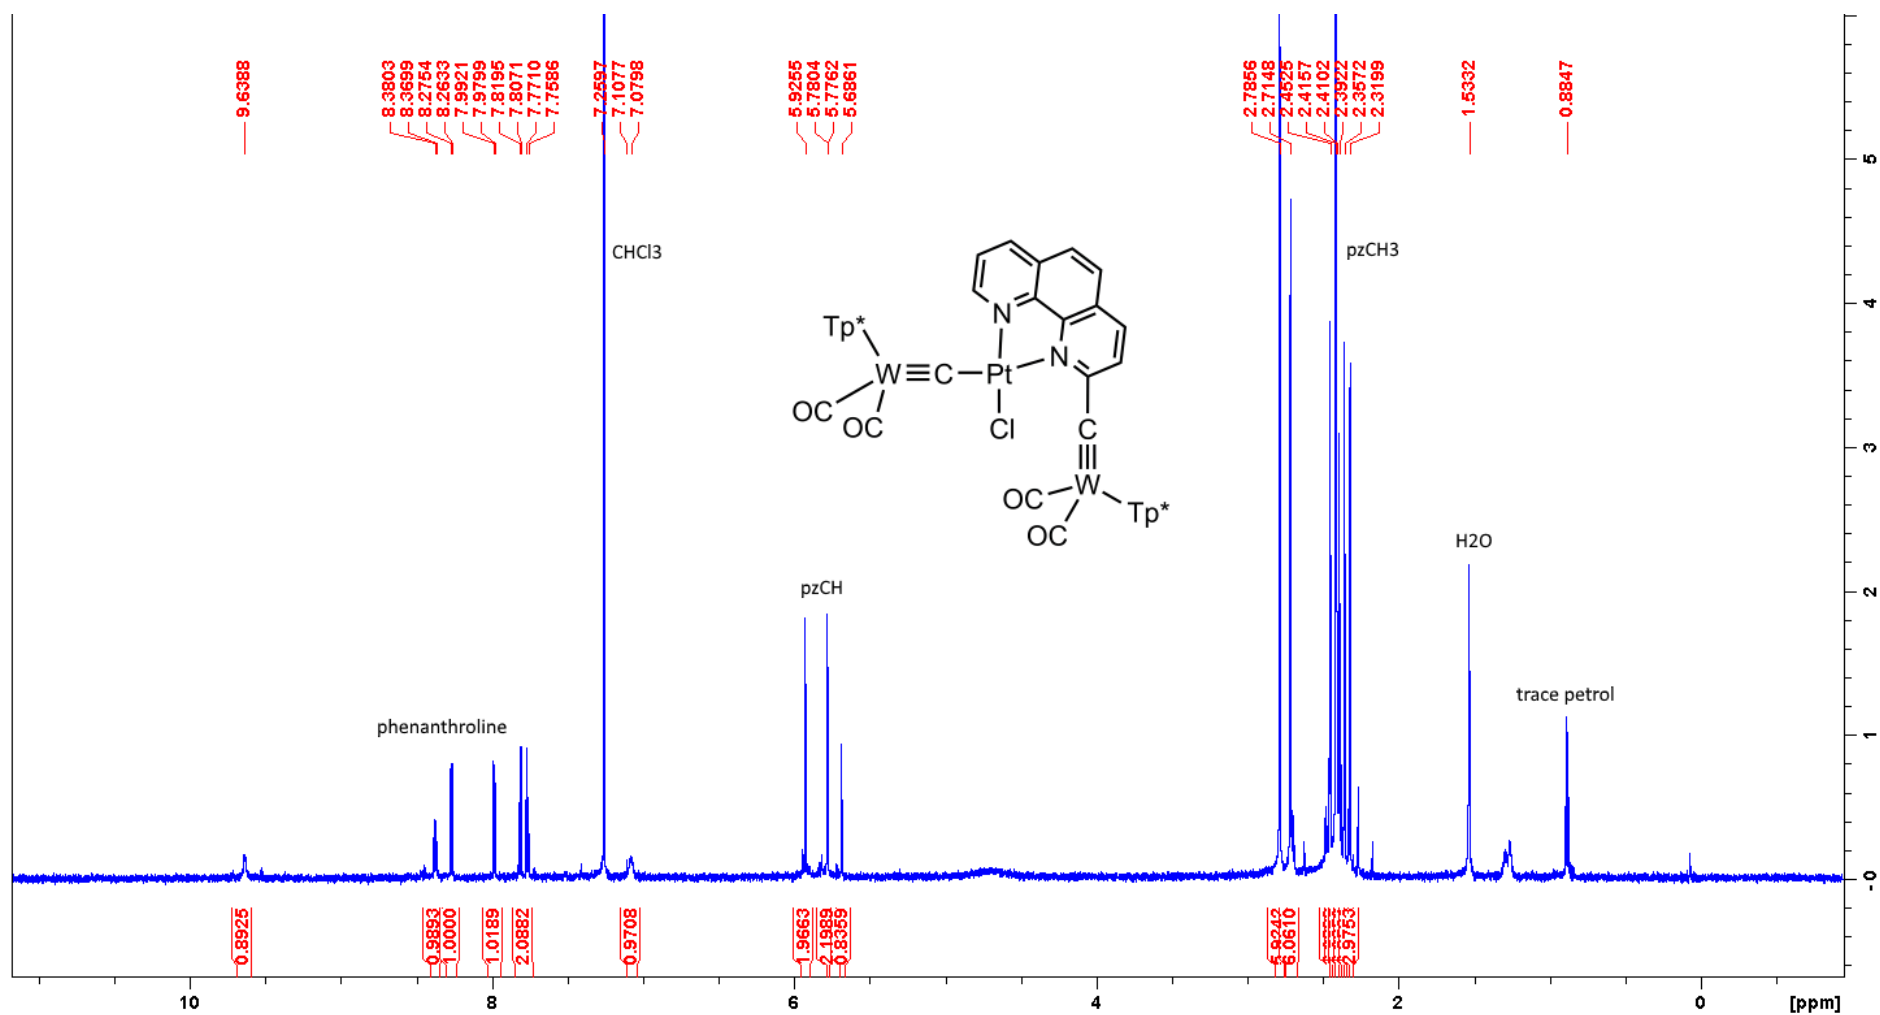

<sup>1</sup>H NMR (600 MHz, CDCl<sub>3</sub>, 25 °C, δ) of [(Tp\*)(CO)<sub>2</sub>W≡C]PtCl(phen{C≡W(CO)<sub>2</sub>(Tp\*)-2}) (5).

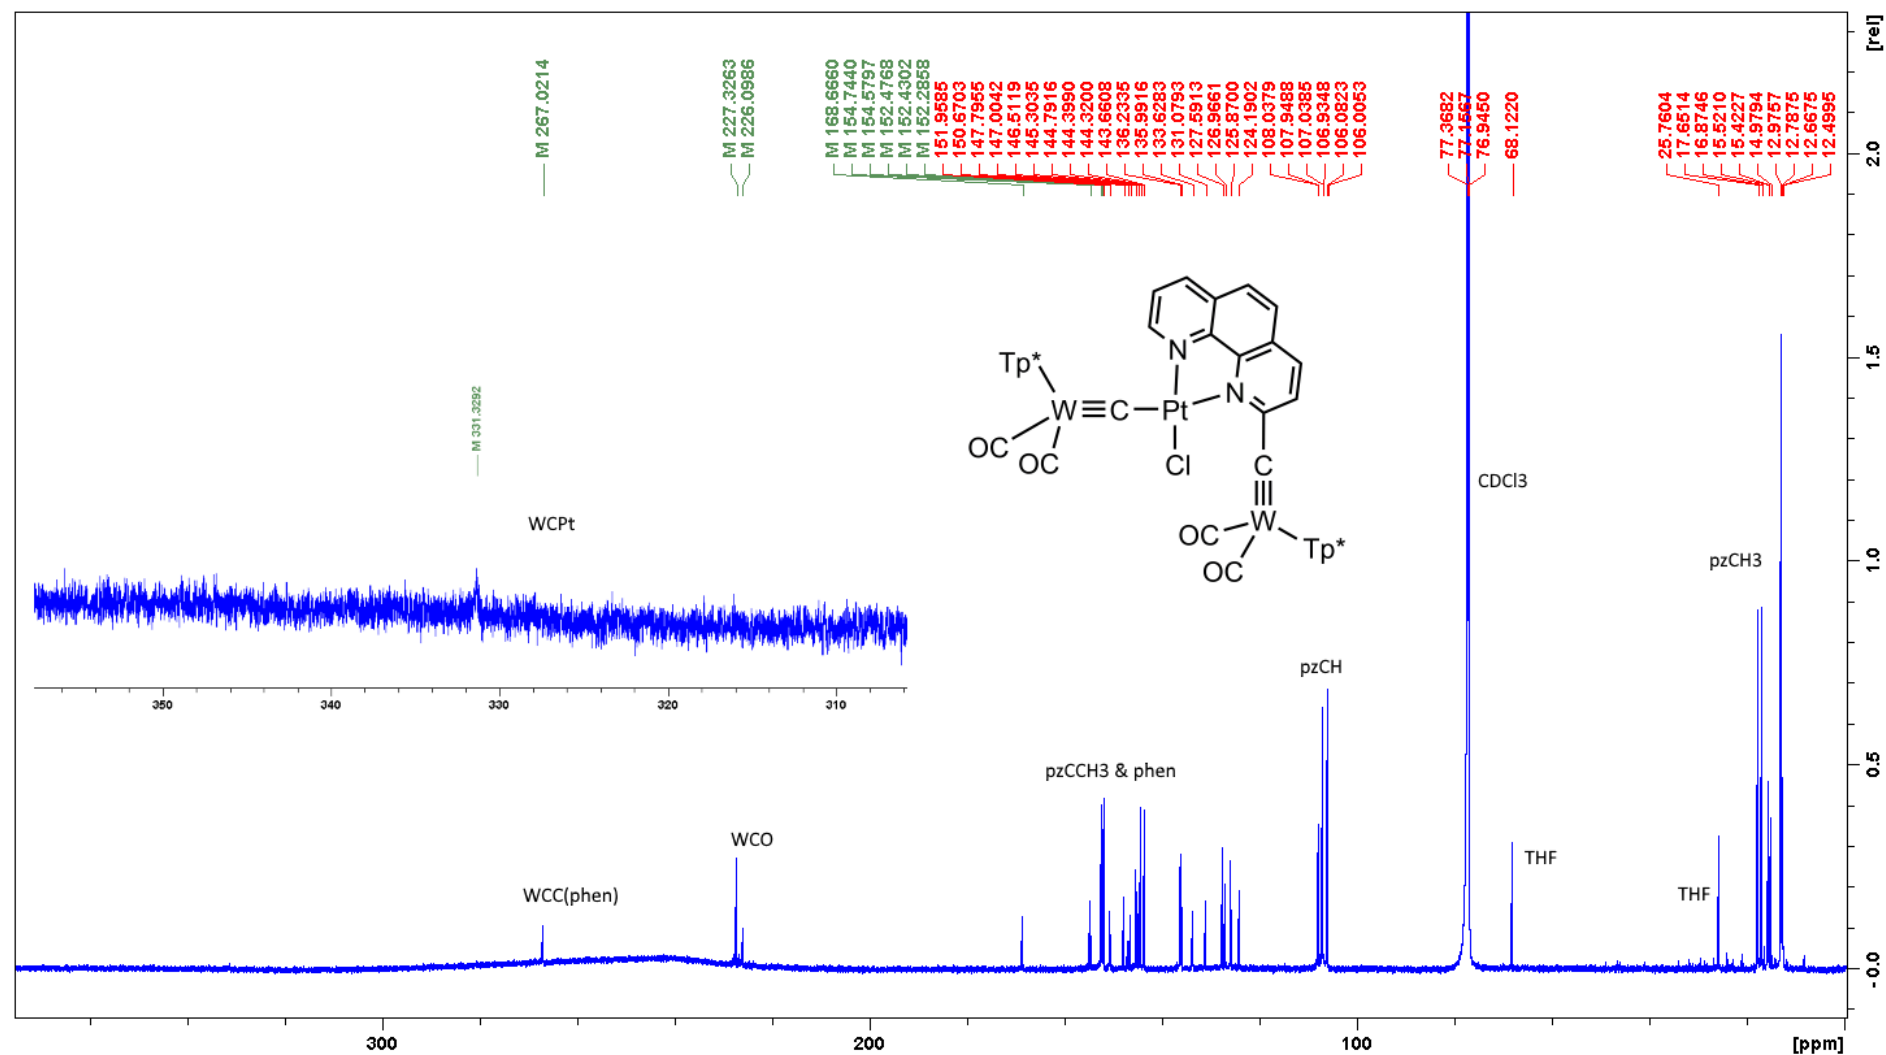

$^{13}\text{C}\{^1\text{H}\}$  NMR (151 MHz,  $\text{CDCl}_3$ , 25 °C,  $\delta$ ) of  $[(\text{Tp}^*)(\text{CO})_2\text{W}\equiv\text{C}\text{PtCl}(\text{phen}\{\text{C}\equiv\text{W}(\text{CO})_2(\text{Tp}^*)-2\})]$  (5).

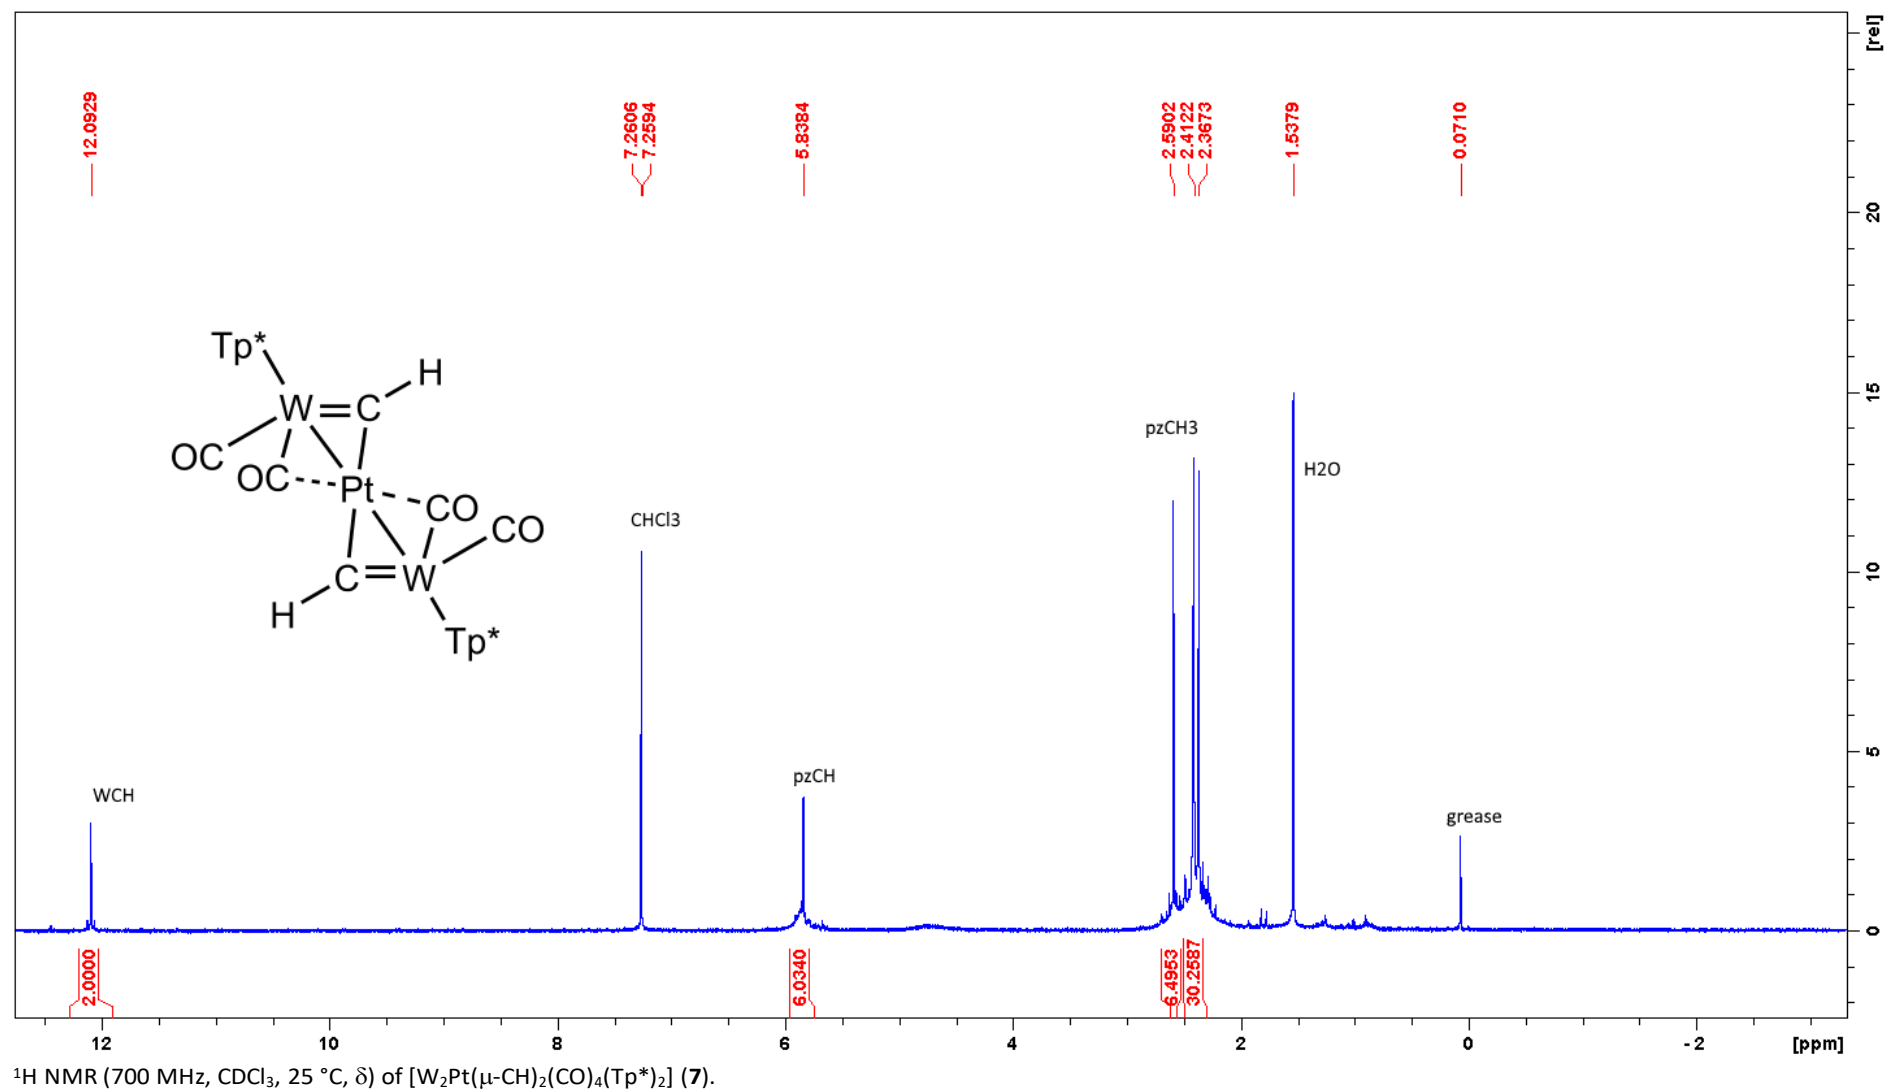

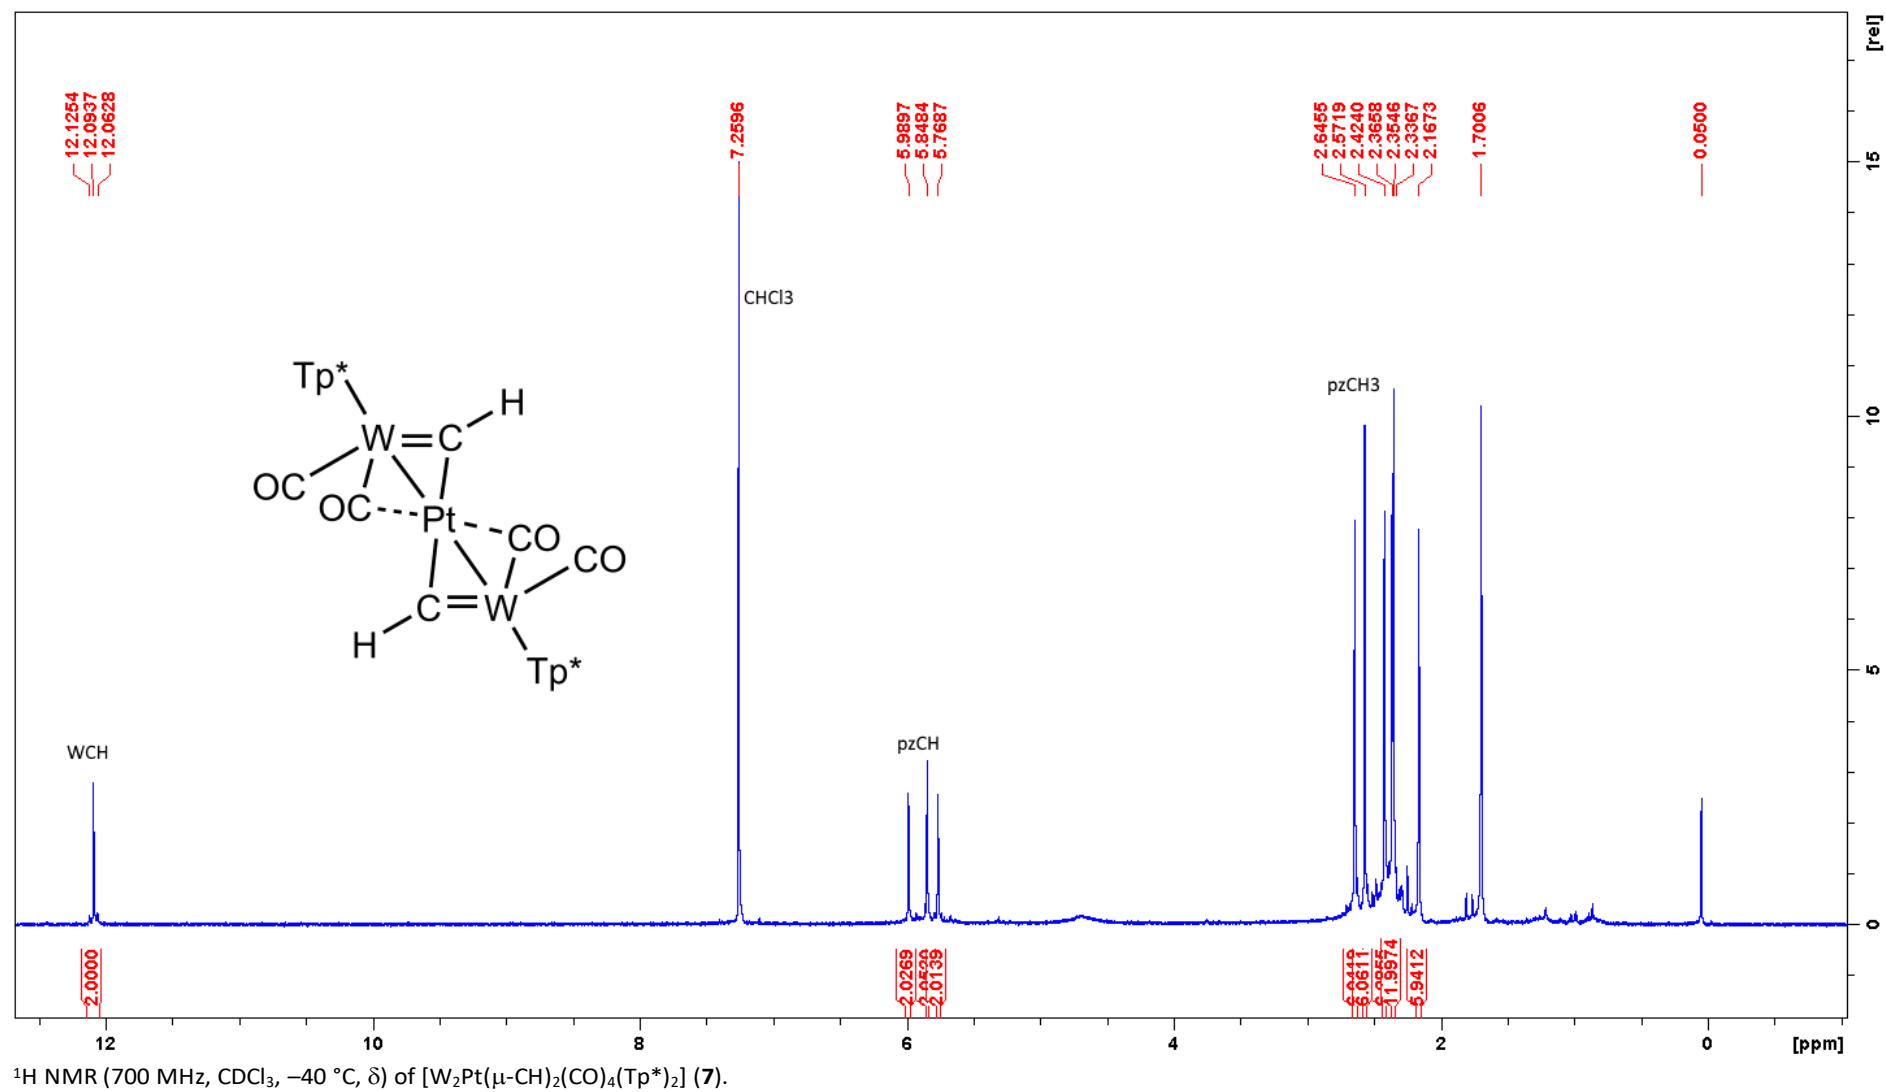

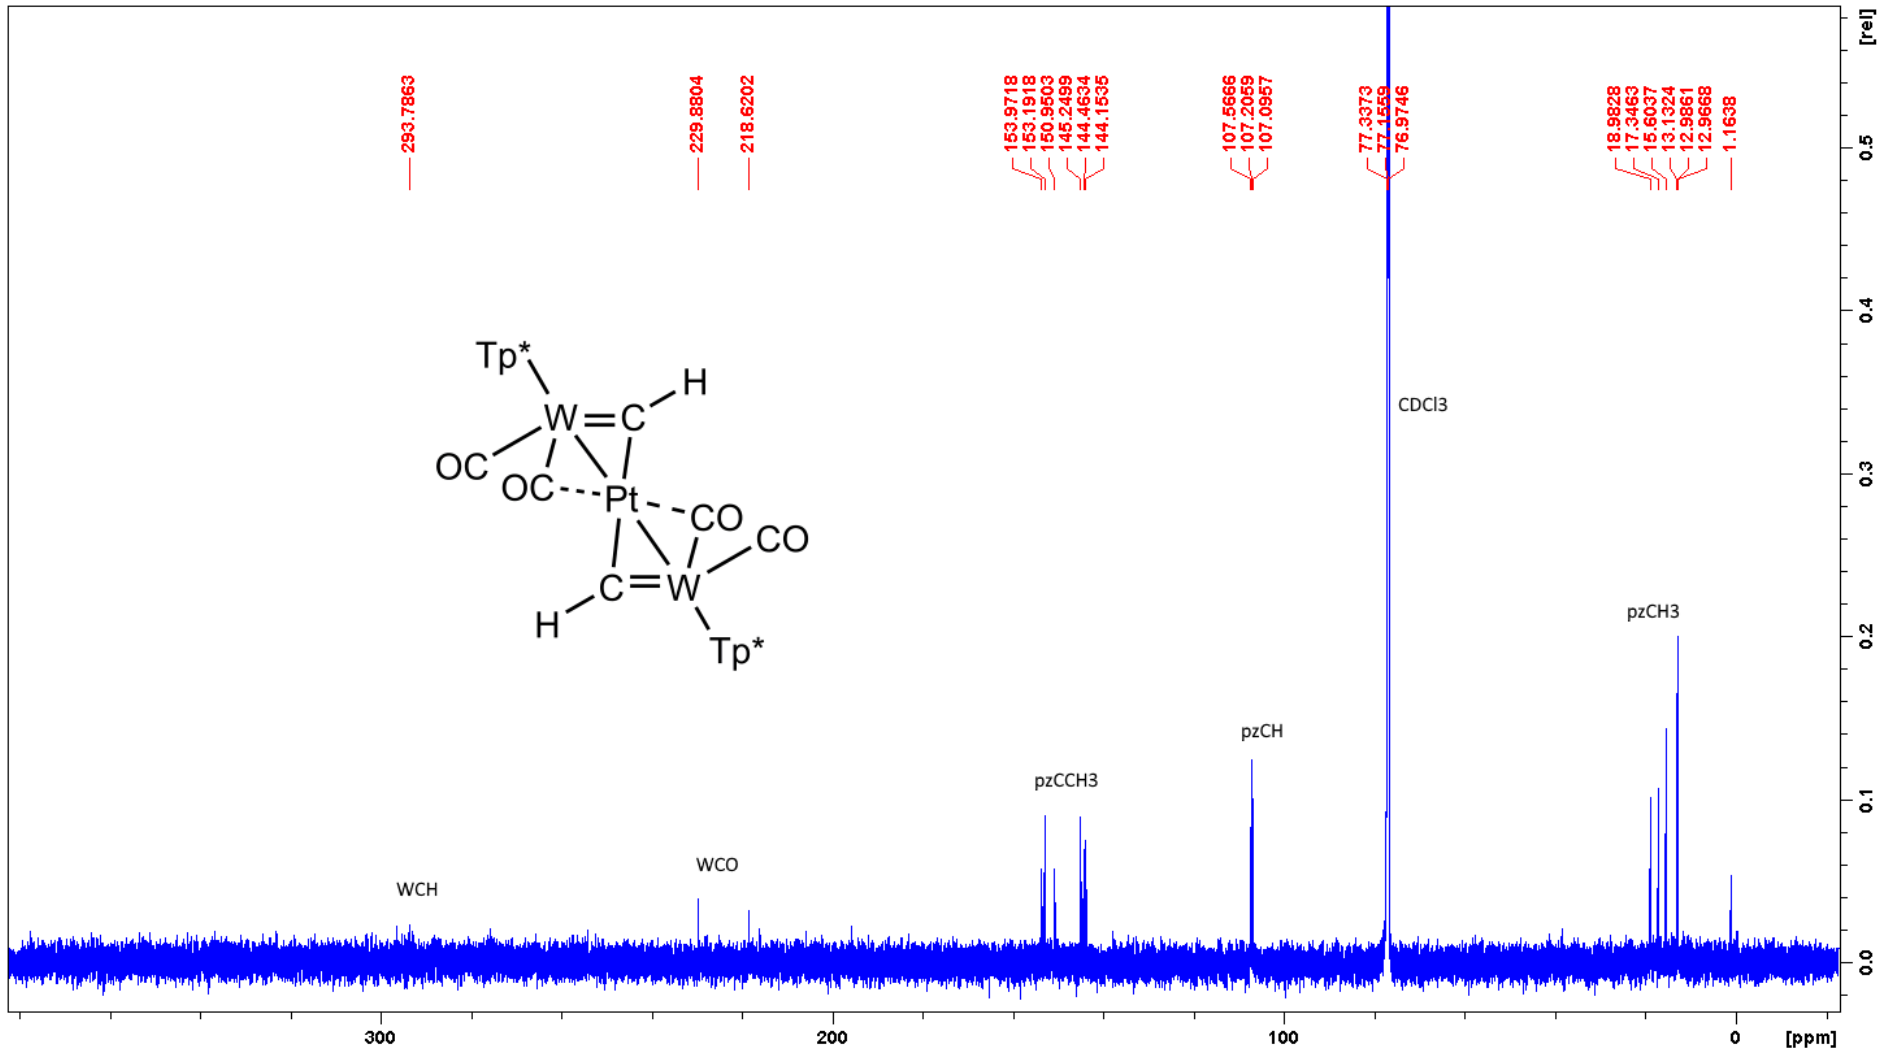
$$^{13}\text{C}\{^1\text{H}\} \text{ NMR (176 MHz, } \text{CDCl}_3, -40^\circ\text{C, } \delta) \text{ of } [\text{W}_2\text{Pt}(\mu\text{-CH})_2(\text{CO})_4(\text{Tp}^*)_2] \text{ (7).}$$

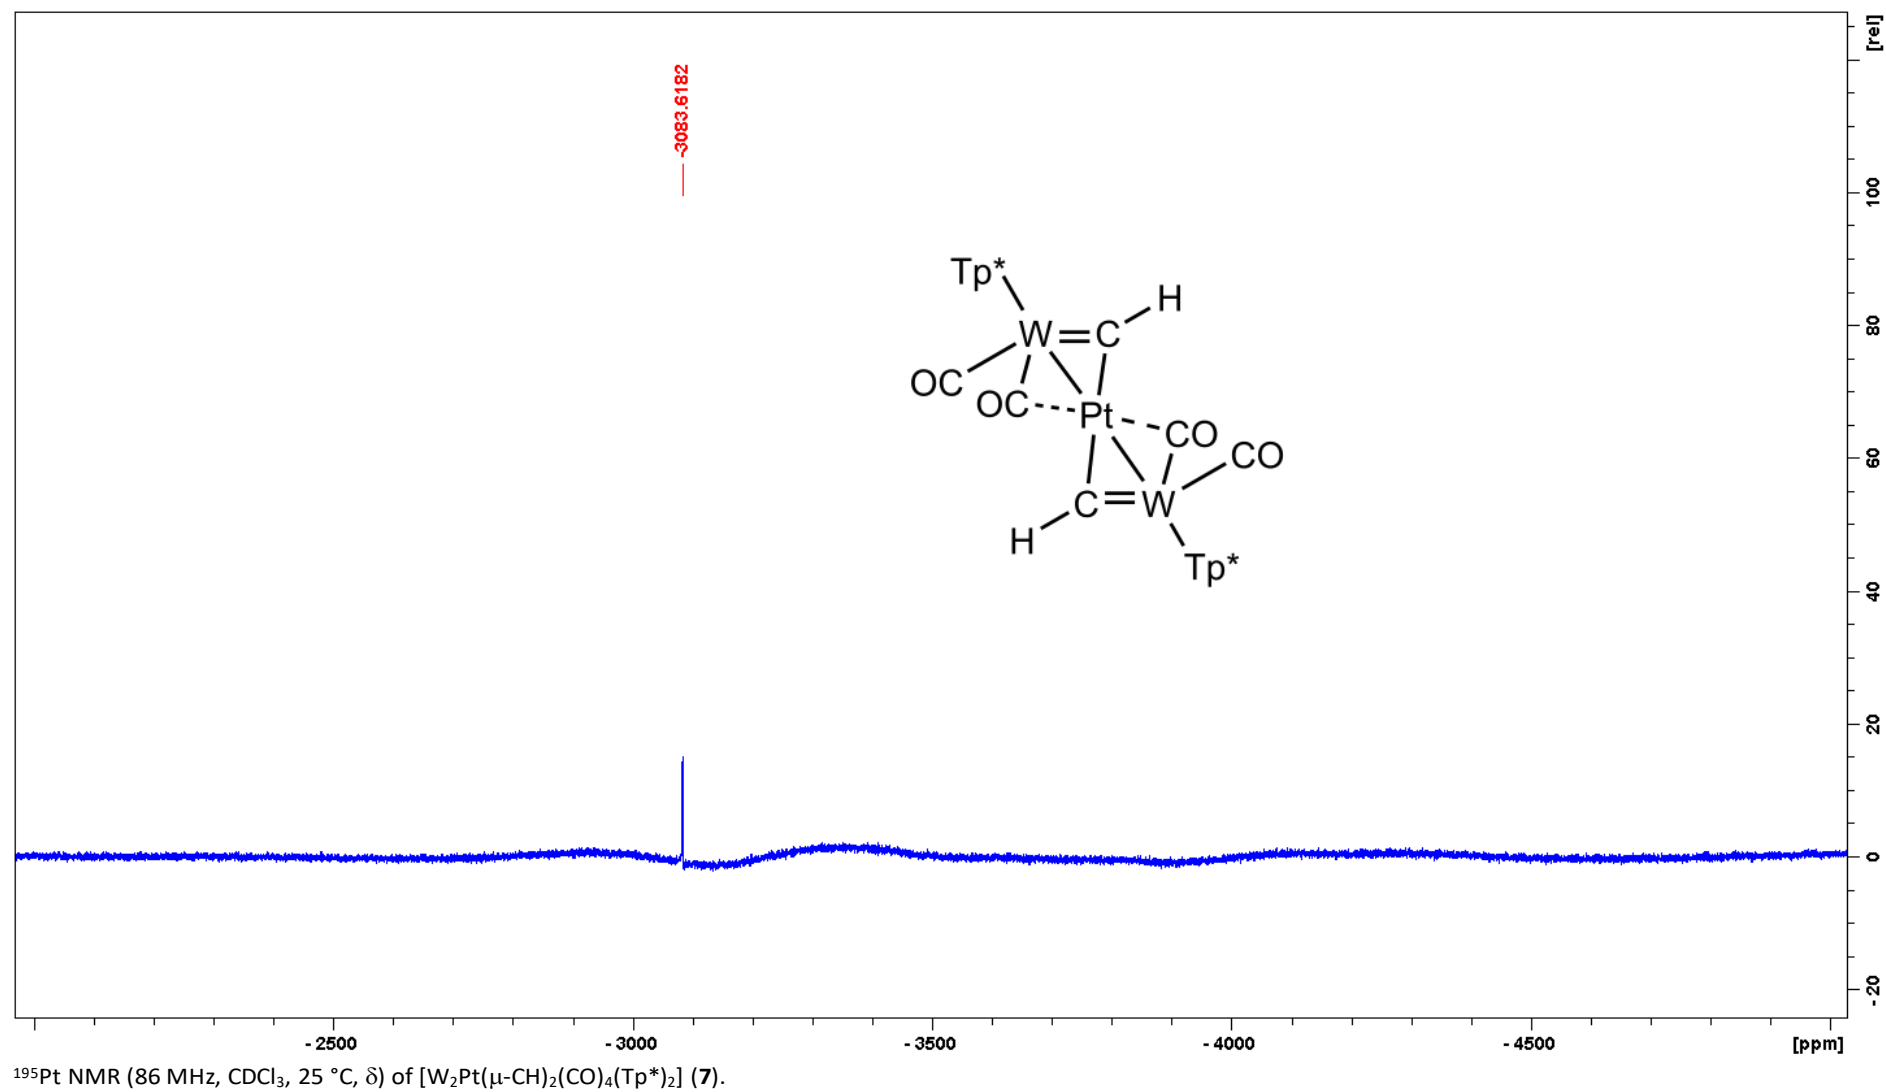

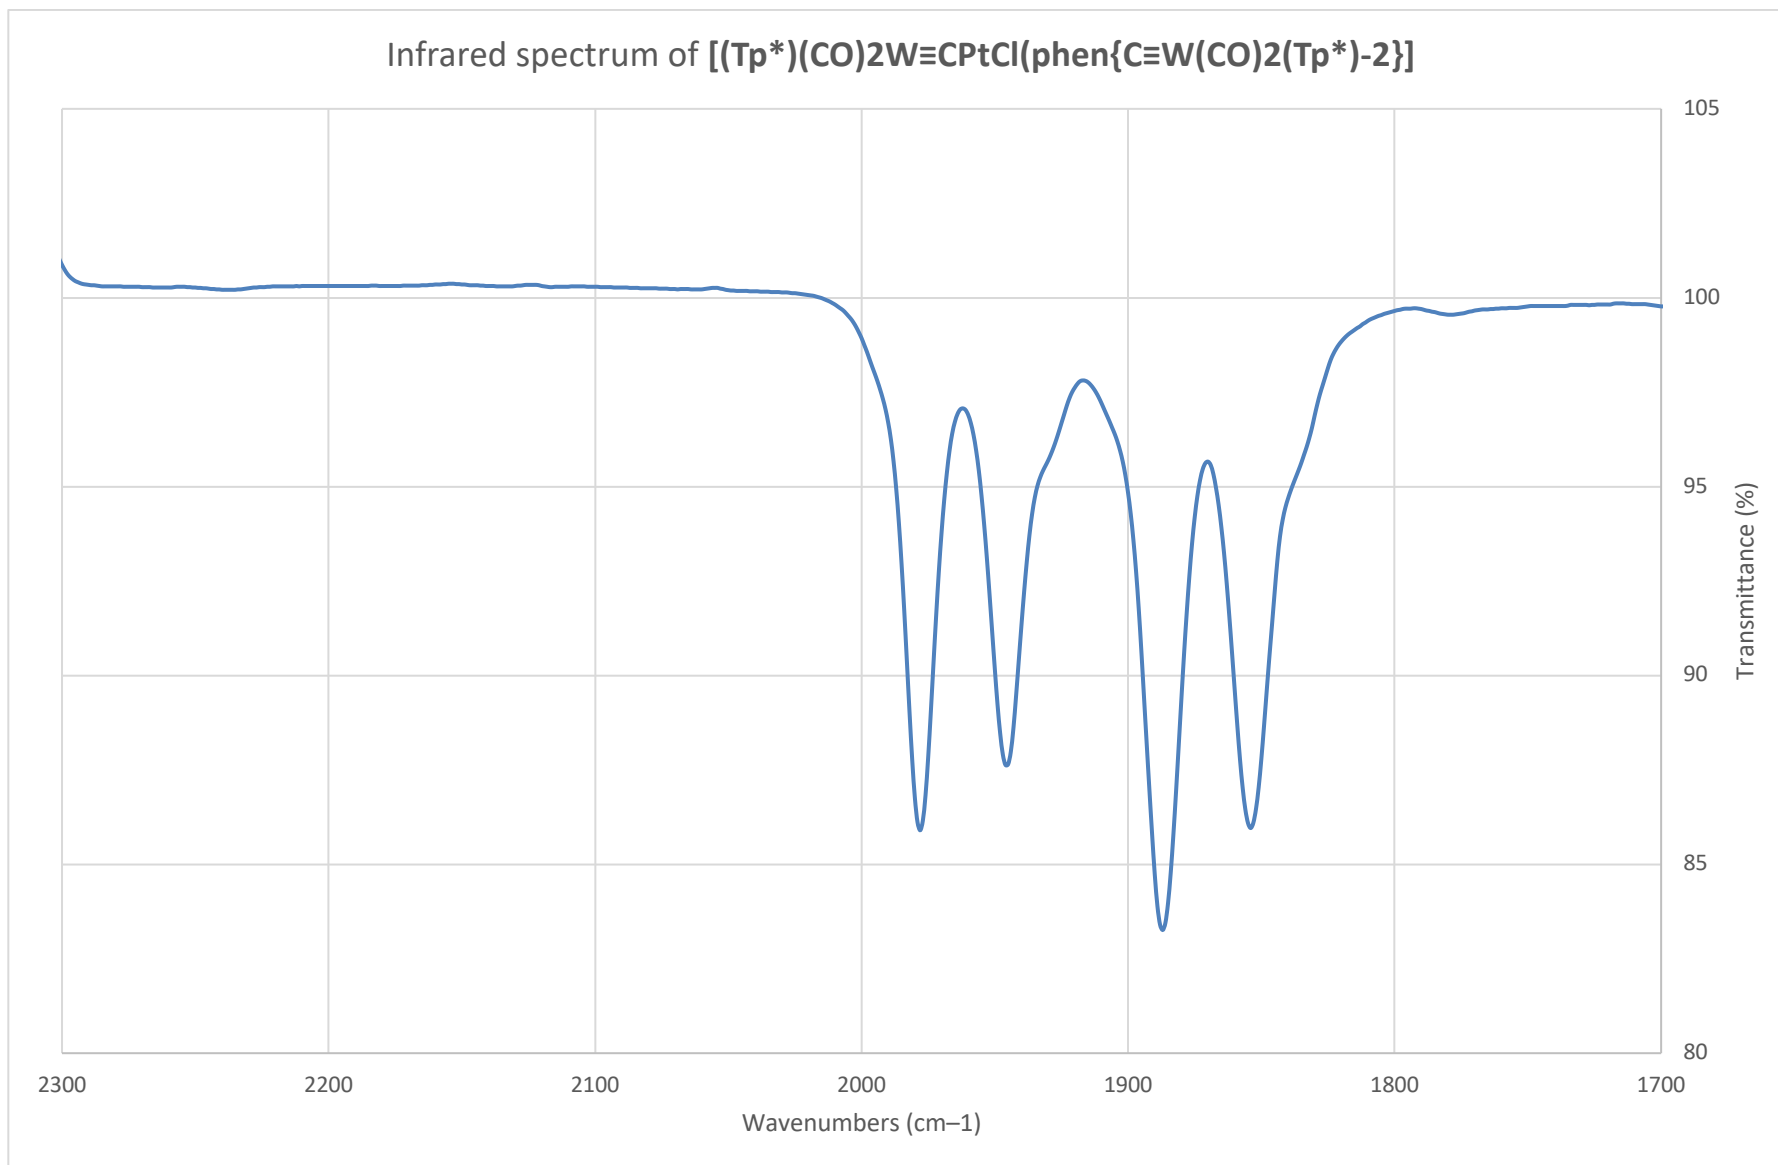

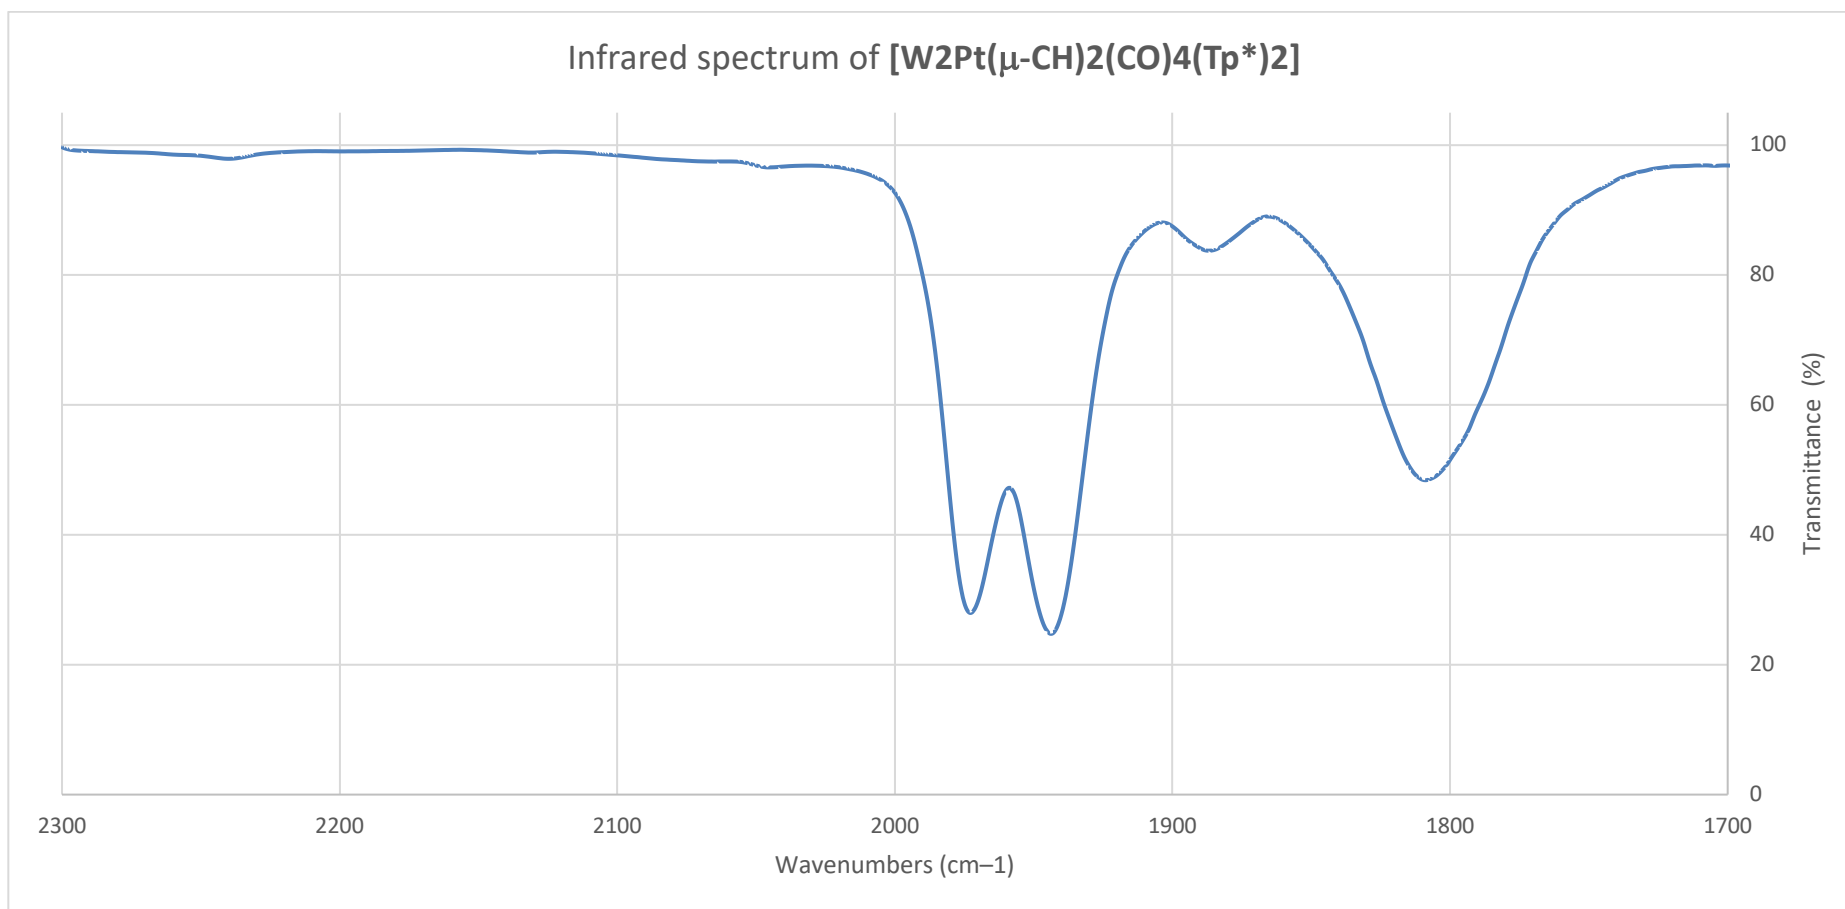

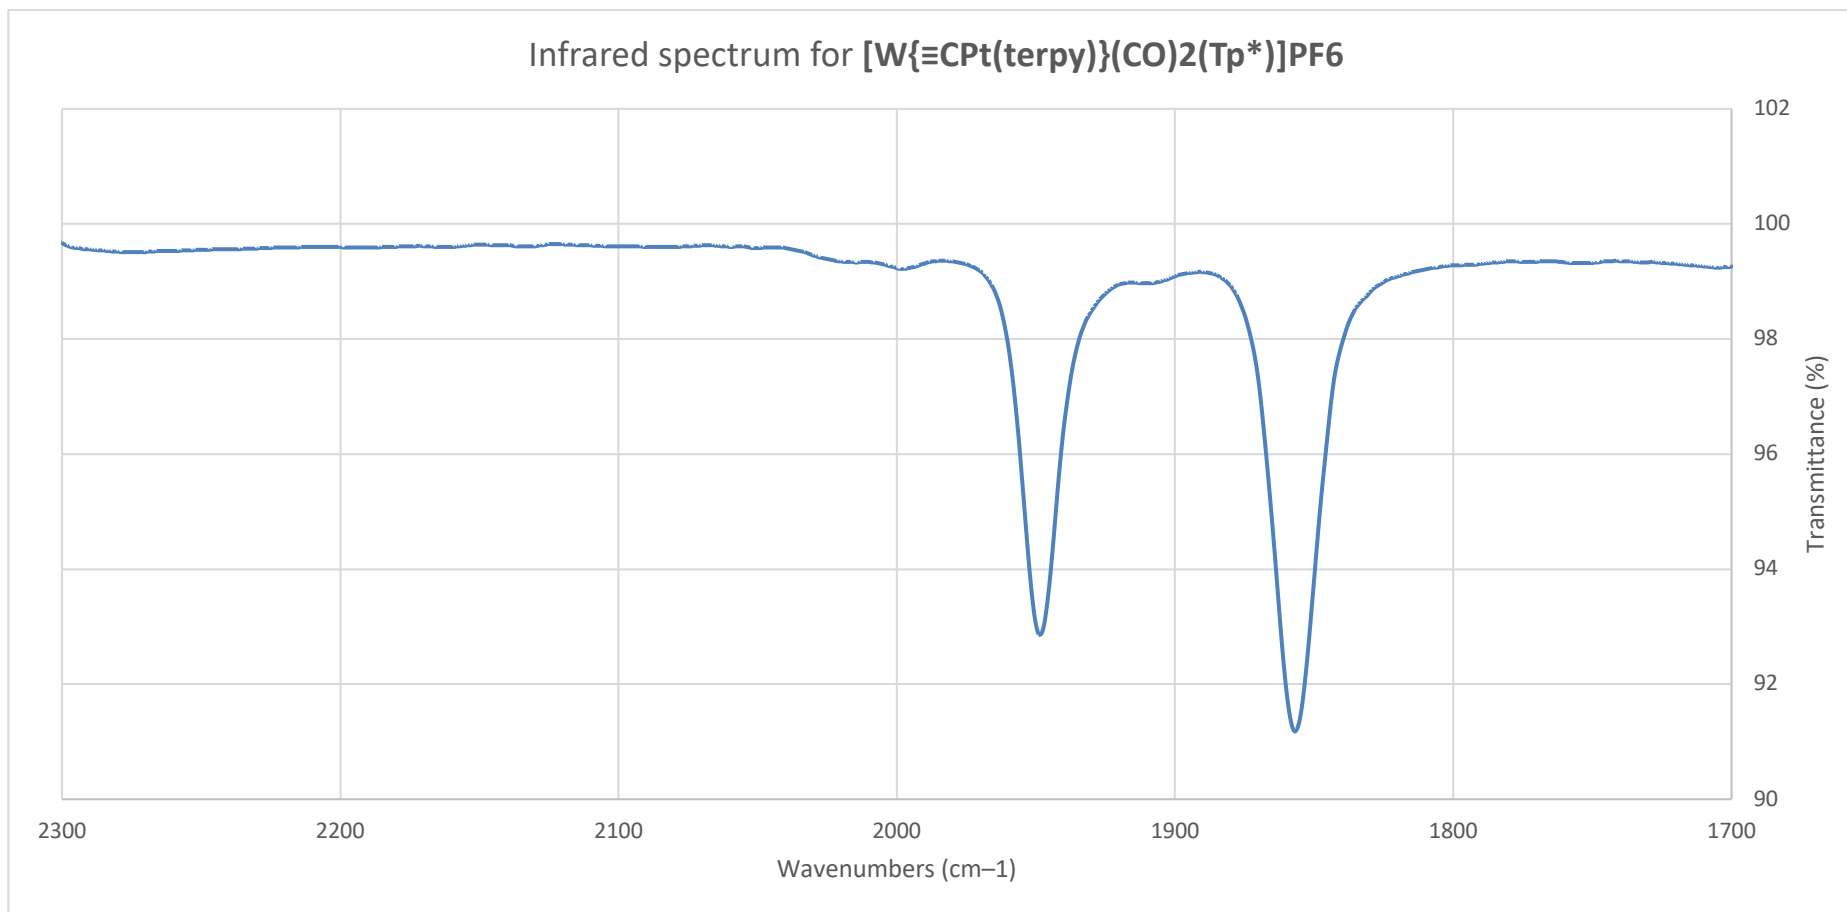

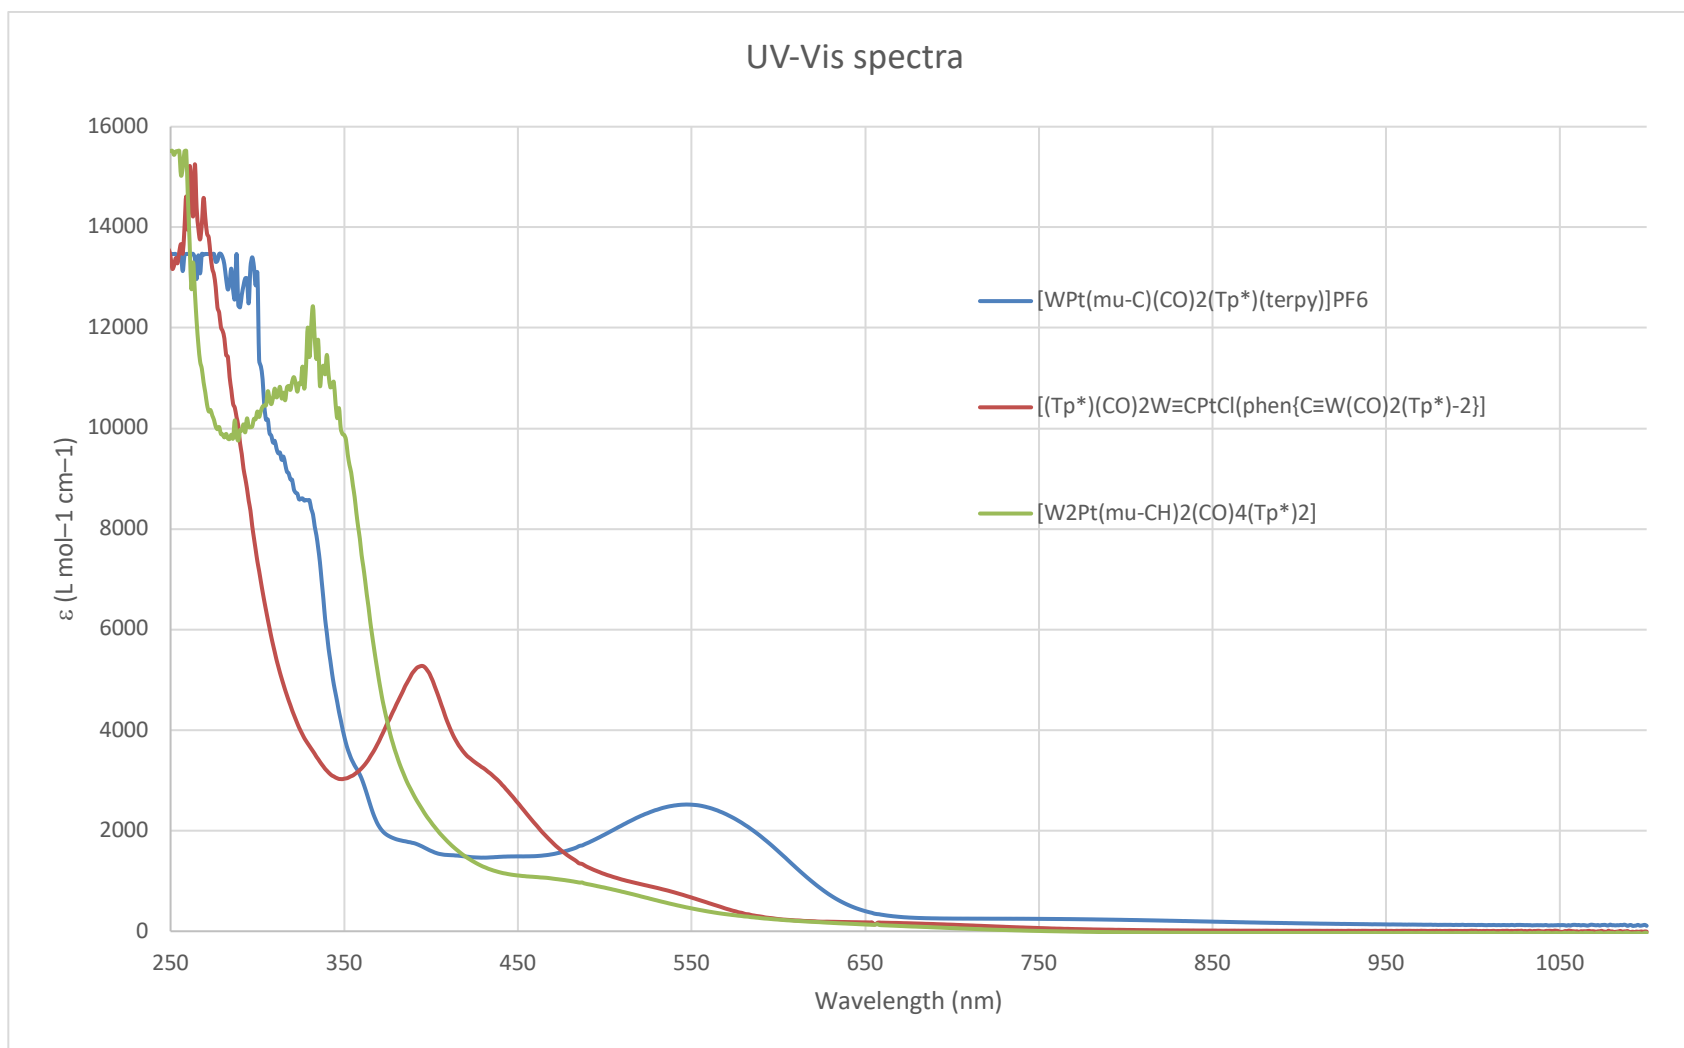

Supplement: c9cc06472a1.pdf [file c9cc06472a1.pdf]
